# Supplementary material for: Master regulator analysis of paragangliomas carrying SDHx, VHL, or MAML3 genetic alterations
Source: PubMed Central journal article supplement (PMC6591808; doi:10.1186/s12885-019-5813-z), 2019-06-24
Supplement: 12885_2019_5813_MOESM17_ESM.pdf [file 12885_2019_5813_MOESM17_ESM.pdf]

**A**

# Differential SDH-loss PPGL MR activity in SDHD-loss tumors in abdomen & thorax vs. head & neck

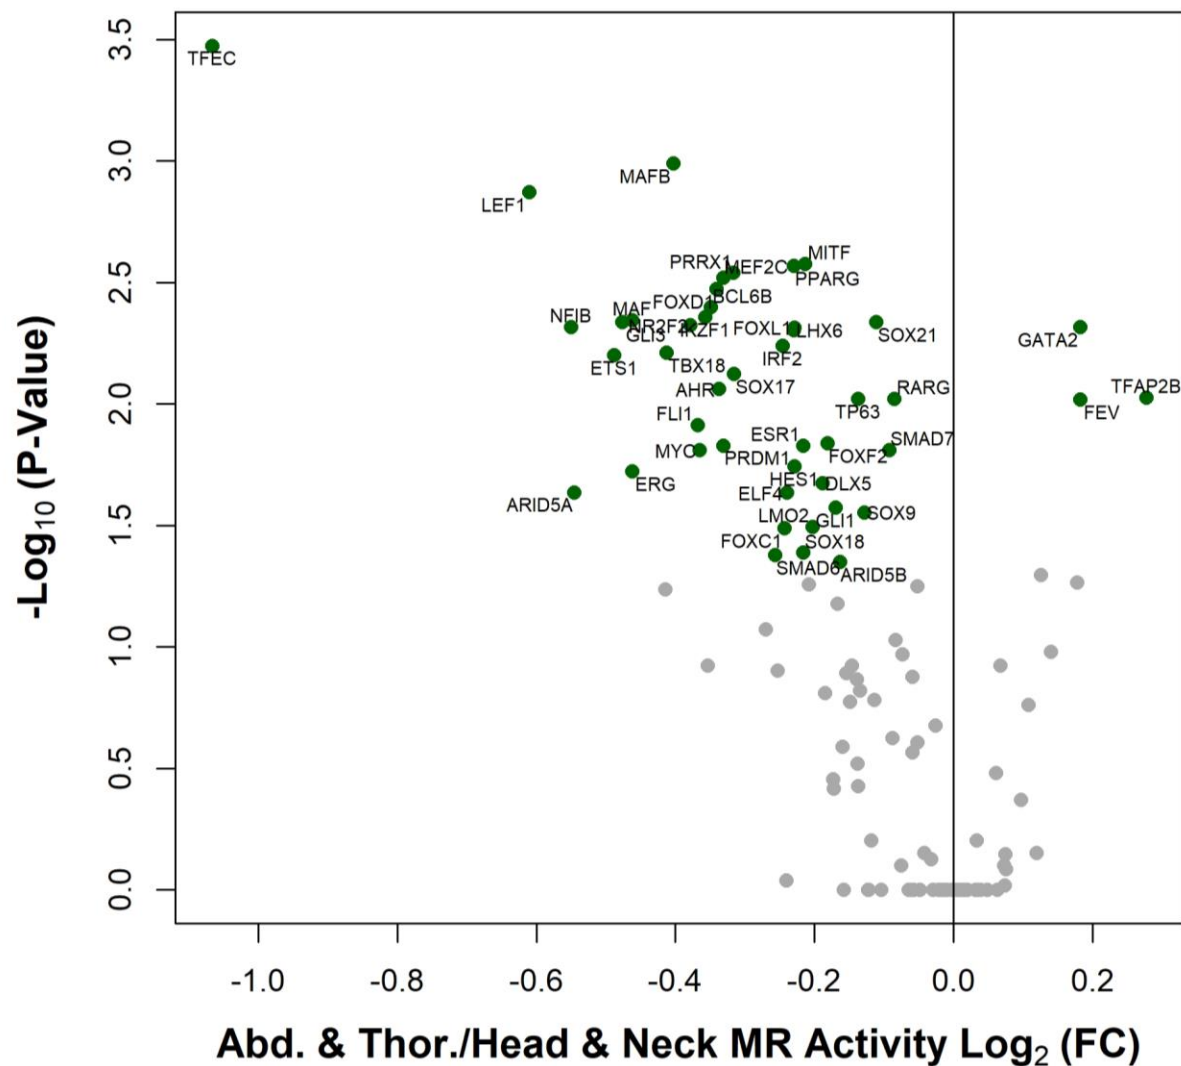**B**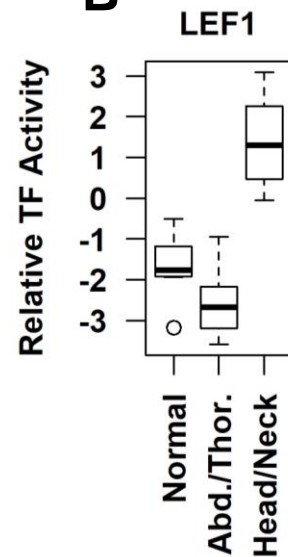**C**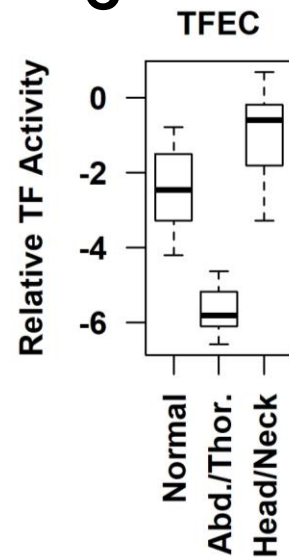**D**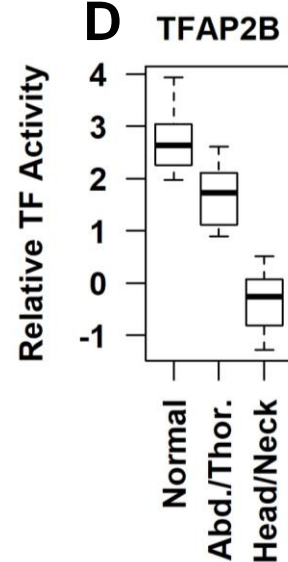**E**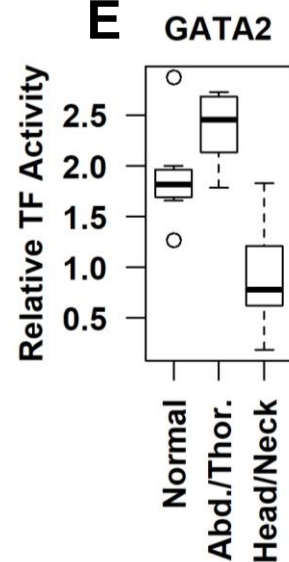**Figure S6**
