# Supplementary material for: Master regulator analysis of paragangliomas carrying SDHx, VHL, or MAML3 genetic alterations
Source: Springer Nature journal article supplement (doi:10.1186/s12885-019-5813-z), 2019-06-24
Supplement: MOESM13 [file 16847730]

# PPGL MAML3 vs. Neuroblastoma MAML3 Overlap

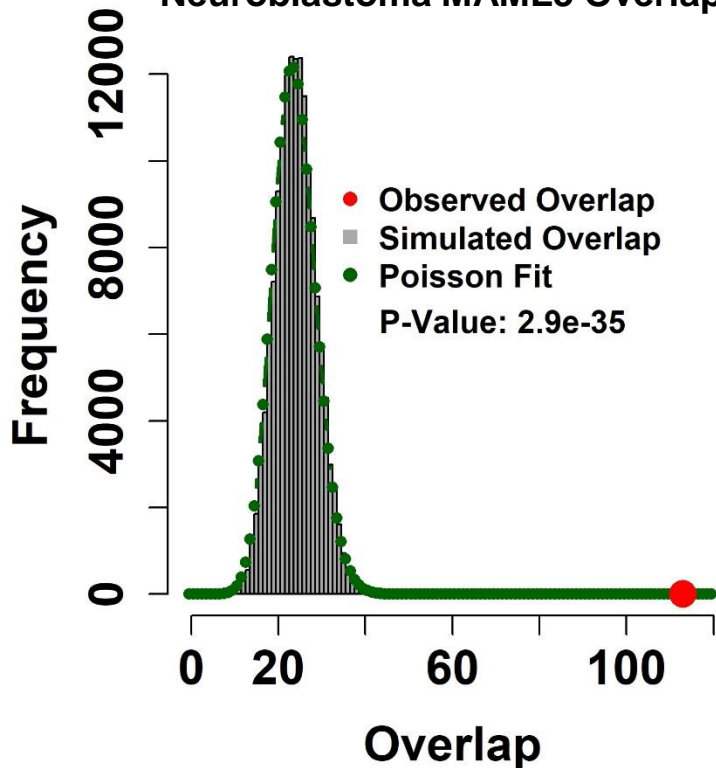

Figure S2
