# Supplementary material for: Master regulator analysis of paragangliomas carrying SDHx, VHL, or MAML3 genetic alterations
Source: Springer Nature journal article supplement (doi:10.1186/s12885-019-5813-z), 2019-06-24
Supplement: MOESM18 [file 16847730]

## A RBP1 Expression

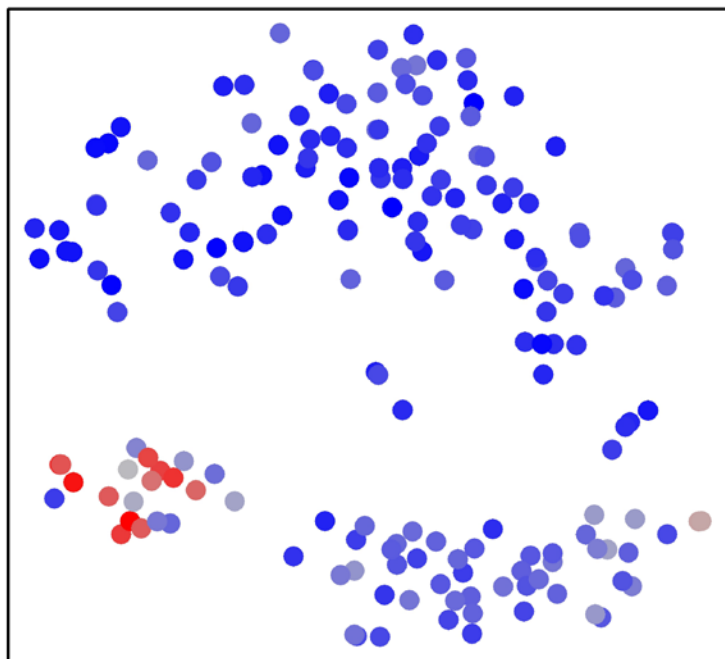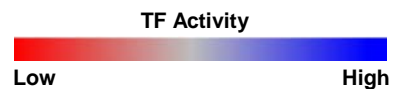

## B Tumor Genotype

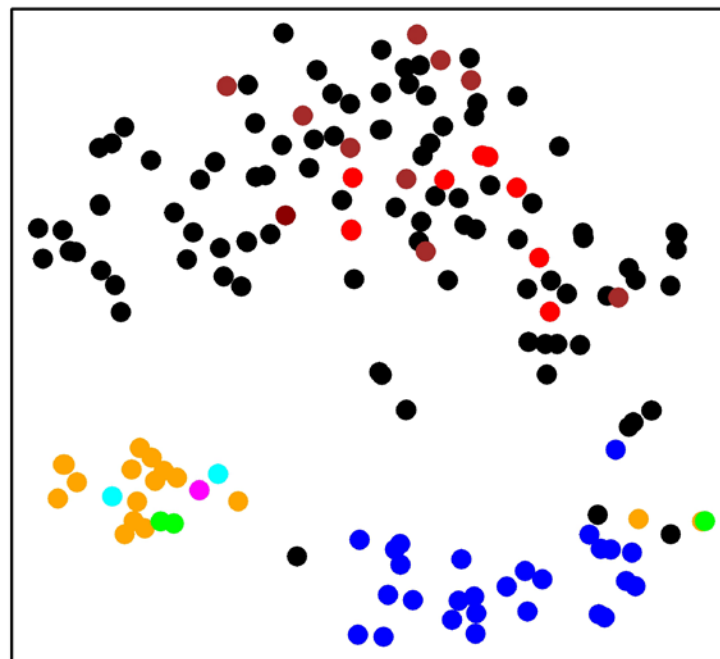

**Genotype:**  
Wild Type  
SDHA  
SDHB  
SDHC  
SDHD  
VHL  
RET  
NF1  
TMEM127

Figure S7
