# Supplementary material for: Master regulator analysis of paragangliomas carrying SDHx, VHL, or MAML3 genetic alterations
Source: BMC Cancer. 2019 Jun 24;19:619. doi: 10.1186/s12885-019-5813-z (PMC6591808; doi:10.1186/s12885-019-5813-z)
Supplement: Supplementary file 4 — Dataset S4. SDHB-loss PPGL master regulators (dpi = 0.00). (CSV 18 kb) [file 12885_2019_5813_MOESM4_ESM.csv]

Regulon	Universe.Size	Regulon.Size	Total.Hits	Expected.Hits	Observed.Hits	Pvalue	Adjusted.Pvalue
NR1H4	16003	269	296	4.98	41	7e-26	3.8e-23
NR5A1	16003	337	296	6.23	35	9.9e-17	2.7e-14
GATA6	16003	194	296	3.59	27	2.6e-16	4.6e-14
VSX1	16003	222	296	4.11	25	4.8e-13	6.4e-11
STAT5A	16003	268	296	4.96	26	5.2e-12	5.5e-10
NKX3-1	16003	188	296	3.48	21	4.4e-11	3.9e-09
TFEC	16003	210	296	3.88	22	5.3e-11	4.1e-09
IRF8	16003	172	296	3.18	19	4.6e-10	3.1e-08
ESR2	16003	263	296	4.86	23	7.2e-10	4.3e-08
SREBF1	16003	179	296	3.31	19	9.1e-10	4.9e-08
FOXJ2	16003	404	296	7.47	27	8.7e-09	4.3e-07
PBX2	16003	145	296	2.68	16	1.1e-08	5.1e-07
NR1I2	16003	113	296	2.09	13	1.7e-07	6.9e-06
ZNF423	16003	197	296	3.64	16	8.1e-07	3.1e-05
HOXA5	16003	91	296	1.68	11	9.2e-07	3.3e-05
PAX8	16003	35	296	0.65	7	3e-06	1e-04
PBX3	16003	303	296	5.6	19	3.8e-06	0.00012
NR0B1	16003	72	296	1.33	9	6.9e-06	0.00021
TBX15	16003	57	296	1.05	8	9.4e-06	0.00027
POU4F1	16003	167	296	3.09	13	1.4e-05	0.00038
SOX11	16003	79	296	1.46	9	1.5e-05	0.00038
TFAP2C	16003	221	296	4.09	15	1.6e-05	0.00039
SOX9	16003	229	296	4.24	15	2.4e-05	0.00057
HOXC8	16003	106	296	1.96	10	2.7e-05	6e-04
FEV	16003	260	296	4.81	16	2.8e-05	0.00061
OSR2	16003	75	296	1.39	8	7.2e-05	0.0015
E2F1	16003	179	296	3.31	12	0.00013	0.0025
EBF2	16003	62	296	1.15	7	0.00014	0.0027
POU3F3	16003	211	296	3.9	13	0.00016	0.0029
RARB	16003	157	296	2.9	11	0.00016	0.003
NR1H3	16003	254	296	4.7	14	0.00028	0.0049
PGR	16003	116	296	2.15	9	3e-04	0.0051
RORB	16003	204	296	3.77	12	0.00043	0.0069
FOXF1	16003	54	296	1	6	0.00047	0.0074
VDR	16003	179	296	3.31	11	0.00051	0.0078
SPI1	16003	403	296	7.45	18	0.00053	0.008
ETV5	16003	185	296	3.42	11	0.00067	0.0098
EGR1	16003	62	296	1.15	6	0.00098	0.014
HOXA11	16003	85	296	1.57	7	0.00099	0.014
IRX3	16003	43	296	0.8	5	0.0011	0.015
TFAP2B	16003	298	296	5.51	14	0.0014	0.018
CEBPG	16003	145	296	2.68	9	0.0015	0.019
HOXA7	16003	50	296	0.92	5	0.0022	0.028
MECOM	16003	73	296	1.35	6	0.0023	0.028
OTX2	16003	56	296	1.04	5	0.0037	0.044
ERG	16003	175	296	3.24	9	0.0053	0.062
AHR	16003	64	296	1.18	5	0.0066	0.072
RORA	16003	119	296	2.2	7	0.0066	0.072
GATA4	16003	91	296	1.68	6	0.0068	0.072
TBX18	16003	91	296	1.68	6	0.0068	0.072
NFIX	16003	182	296	3.37	9	0.0069	0.072
E2F7	16003	183	296	3.38	9	0.0071	0.073
STAT4	16003	193	296	3.57	9	0.0099	0.1
SOX10	16003	46	296	0.85	4	0.01	0.1
SMAD7	16003	196	296	3.63	9	0.011	0.11
ETV4	16003	137	296	2.53	7	0.014	0.13
KLF4	16003	52	296	0.96	4	0.015	0.15
RXRG	16003	109	296	2.02	6	0.016	0.15
TGIF1	16003	110	296	2.03	6	0.016	0.15
MYC	16003	82	296	1.52	5	0.018	0.16
BARHL1	16003	146	296	2.7	7	0.019	0.17
FOXM1	16003	252	296	4.66	10	0.019	0.17
MAFB	16003	56	296	1.04	4	0.02	0.17
ZEB1	16003	335	296	6.2	12	0.022	0.19
PITX1	16003	153	296	2.83	7	0.024	0.2
HOXA1	16003	89	296	1.65	5	0.025	0.2
E2F6	16003	191	296	3.53	8	0.026	0.21
ESRRA	16003	268	296	4.96	10	0.028	0.22
THRB	16003	62	296	1.15	4	0.028	0.22
E2F5	16003	271	296	5.01	10	0.03	0.23
FOXO1	16003	127	296	2.35	6	0.031	0.23
OSR1	16003	38	296	0.7	3	0.033	0.24
MAF	16003	131	296	2.42	6	0.035	0.26
EPAS1	16003	168	296	3.11	7	0.037	0.27
TCF7	16003	103	296	1.91	5	0.042	0.3
EBF3	16003	44	296	0.81	3	0.048	0.34
SIX4	16003	299	296	5.53	10	0.052	0.36
ASCL1	16003	182	296	3.37	7	0.053	0.36
TFAP2A	16003	110	296	2.03	5	0.053	0.36
ZIC3	16003	80	296	1.48	4	0.061	0.41
HOXD10	16003	53	296	0.98	3	0.075	0.49
SOX6	16003	53	296	0.98	3	0.075	0.49
ESR1	16003	25	296	0.46	2	0.077	0.49
PHOX2A	16003	160	296	2.96	6	0.077	0.49
SATB1	16003	123	296	2.28	5	0.078	0.49
SREBF2	16003	87	296	1.61	4	0.078	0.49
HNF1B	16003	55	296	1.02	3	0.081	0.5
HIC1	16003	56	296	1.04	3	0.085	0.52
ETV1	16003	91	296	1.68	4	0.088	0.53
SHOX2	16003	91	296	1.68	4	0.088	0.53
EVX1	16003	58	296	1.07	3	0.092	0.54
NFIC	16003	174	296	3.22	6	0.1	0.6
STAT5B	16003	134	296	2.48	5	0.1	0.6
DLX5	16003	136	296	2.52	5	0.11	0.6
EN1	16003	98	296	1.81	4	0.11	0.6
HLF	16003	175	296	3.24	6	0.11	0.6
PKNOX2	16003	135	296	2.5	5	0.11	0.6
FOXL1	16003	139	296	2.57	5	0.12	0.63
MNX1	16003	33	296	0.61	2	0.12	0.67
ZNF628	16003	66	296	1.22	3	0.12	0.67
POU3F2	16003	67	296	1.24	3	0.13	0.68
DLX1	16003	106	296	1.96	4	0.13	0.7
HMX1	16003	71	296	1.31	3	0.14	0.75
SIX1	16003	37	296	0.68	2	0.15	0.77
HAND2	16003	421	296	7.79	11	0.16	0.81
HOXC6	16003	39	296	0.72	2	0.16	0.82
IKZF1	16003	76	296	1.41	3	0.17	0.83
ELF1	16003	42	296	0.78	2	0.18	0.89
GLI2	16003	120	296	2.22	4	0.18	0.89
NFIA	16003	294	296	5.44	8	0.18	0.89
POU3F1	16003	121	296	2.24	4	0.19	0.9
HOXD9	16003	86	296	1.59	3	0.21	1
JUNB	16003	46	296	0.85	2	0.21	1
STAT6	16003	217	296	4.01	6	0.21	1
PRRX1	16003	48	296	0.89	2	0.22	1
FGF9	16003	223	296	4.12	6	0.23	1
KLF15	16003	90	296	1.66	3	0.23	1
PPARG	16003	49	296	0.91	2	0.23	1
TEAD1	16003	315	296	5.83	8	0.23	1
DLX4	16003	50	296	0.92	2	0.24	1
EHF	16003	91	296	1.68	3	0.24	1
IRX4	16003	226	296	4.18	6	0.24	1
MYBL2	16003	180	296	3.33	5	0.24	1
RFX5	16003	367	296	6.79	9	0.24	1
SMAD4	16003	15	296	0.28	1	0.24	1
IRX5	16003	54	296	1	2	0.26	1
LHX2	16003	96	296	1.78	3	0.26	1
PPARA	16003	284	296	5.25	7	0.27	1
TFEB	16003	188	296	3.48	5	0.27	1
ISL2	16003	100	296	1.85	3	0.28	1
HOXD11	16003	18	296	0.33	1	0.29	1
FOXO4	16003	390	296	7.21	9	0.3	1
GATA2	16003	196	296	3.63	5	0.3	1
SMAD3	16003	104	296	1.92	3	0.3	1
HOXA10	16003	20	296	0.37	1	0.31	1
ONECUT2	16003	151	296	2.79	4	0.31	1
RARA	16003	151	296	2.79	4	0.31	1
CEBPA	16003	110	296	2.03	3	0.33	1
E2F2	16003	110	296	2.03	3	0.33	1
IRF6	16003	109	296	2.02	3	0.33	1
PLAGL1	16003	205	296	3.79	5	0.33	1
ELK4	16003	24	296	0.44	1	0.36	1
GLI1	16003	25	296	0.46	1	0.37	1
HOXA6	16003	25	296	0.46	1	0.37	1
MEF2C	16003	25	296	0.46	1	0.37	1
STAT3	16003	118	296	2.18	3	0.37	1
HOXB5	16003	26	296	0.48	1	0.38	1
HOXC4	16003	26	296	0.48	1	0.38	1
SP1	16003	268	296	4.96	6	0.38	1
IRF5	16003	172	296	3.18	4	0.39	1
OTX1	16003	121	296	2.24	3	0.39	1
AR	16003	76	296	1.41	2	0.41	1
ARX	16003	76	296	1.41	2	0.41	1
NKX6-3	16003	76	296	1.41	2	0.41	1
NR5A2	16003	76	296	1.41	2	0.41	1
SOX2	16003	75	296	1.39	2	0.41	1
CEBPD	16003	77	296	1.42	2	0.42	1
FOXQ1	16003	29	296	0.54	1	0.42	1
SOX21	16003	29	296	0.54	1	0.42	1
TBX22	16003	78	296	1.44	2	0.42	1
CBFB	16003	233	296	4.31	5	0.43	1
RFXAP	16003	231	296	4.27	5	0.43	1
ZFP42	16003	130	296	2.4	3	0.43	1
HAND1	16003	132	296	2.44	3	0.44	1
NR3C1	16003	182	296	3.37	4	0.44	1
FOXF2	16003	32	296	0.59	1	0.45	1
GTF2IRD1	16003	185	296	3.42	4	0.45	1
RXRA	16003	186	296	3.44	4	0.45	1
BACH2	16003	135	296	2.5	3	0.46	1
CUX1	16003	240	296	4.44	5	0.46	1
TBX5	16003	84	296	1.55	2	0.46	1
LMO2	16003	86	296	1.59	2	0.47	1
TCF4	16003	138	296	2.55	3	0.47	1
MECP2	16003	192	296	3.55	4	0.48	1
NFKB1	16003	140	296	2.59	3	0.48	1
ARNT	16003	141	296	2.61	3	0.49	1
CTCF	16003	36	296	0.67	1	0.49	1
HSF1	16003	250	296	4.62	5	0.49	1
MEOX1	16003	36	296	0.67	1	0.49	1
BHLHE40	16003	37	296	0.68	1	0.5	1
CNOT3	16003	91	296	1.68	2	0.5	1
GZF1	16003	143	296	2.65	3	0.5	1
DMRT1	16003	39	296	0.72	1	0.52	1
GLI3	16003	203	296	3.75	4	0.52	1
PRDM1	16003	39	296	0.72	1	0.52	1
RFX1	16003	204	296	3.77	4	0.52	1
RUNX2	16003	149	296	2.76	3	0.52	1
LMX1B	16003	40	296	0.74	1	0.53	1
MYB	16003	40	296	0.74	1	0.53	1
MYCN	16003	205	296	3.79	4	0.53	1
LHX3	16003	42	296	0.78	1	0.54	1
NKX6-2	16003	42	296	0.78	1	0.54	1
ZBTB7A	16003	41	296	0.76	1	0.54	1
ZIC1	16003	42	296	0.78	1	0.54	1
BCL6B	16003	100	296	1.85	2	0.55	1
SMAD9	16003	43	296	0.8	1	0.55	1
SOX12	16003	99	296	1.83	2	0.55	1
ZNF8	16003	155	296	2.87	3	0.55	1
HOXD13	16003	102	296	1.89	2	0.57	1
MITF	16003	47	296	0.87	1	0.58	1
MYOG	16003	105	296	1.94	2	0.58	1
NKX6-1	16003	46	296	0.85	1	0.58	1
PITX3	16003	47	296	0.87	1	0.58	1
REST	16003	332	296	6.14	6	0.58	1
HOXC10	16003	48	296	0.89	1	0.59	1
HOXD1	16003	393	296	7.27	7	0.59	1
DMBX1	16003	51	296	0.94	1	0.61	1
EMX2	16003	51	296	0.94	1	0.61	1
FOXD1	16003	50	296	0.92	1	0.61	1
ONECUT1	16003	50	296	0.92	1	0.61	1
TFCP2L1	16003	111	296	2.05	2	0.61	1
FOXD3	16003	112	296	2.07	2	0.62	1
TCF3	16003	174	296	3.22	3	0.63	1
ETS1	16003	178	296	3.29	3	0.64	1
HOXB4	16003	54	296	1	1	0.64	1
TP73	16003	55	296	1.02	1	0.64	1
ARNT2	16003	182	296	3.37	3	0.66	1
ESRRB	16003	59	296	1.09	1	0.67	1
HNF1A	16003	123	296	2.28	2	0.67	1
GABPA	16003	63	296	1.17	1	0.69	1
HOXA4	16003	62	296	1.15	1	0.69	1
KLF11	16003	63	296	1.17	1	0.69	1
E2F3	16003	377	296	6.97	6	0.7	1
FOXJ1	16003	65	296	1.2	1	0.7	1
IRF2	16003	194	296	3.59	3	0.7	1
NKX2-3	16003	65	296	1.2	1	0.7	1
PAX5	16003	194	296	3.59	3	0.7	1
DLX2	16003	66	296	1.22	1	0.71	1
GABPB2	16003	135	296	2.5	2	0.72	1
LHX9	16003	68	296	1.26	1	0.72	1
SOX4	16003	136	296	2.52	2	0.72	1
ATF5	16003	70	296	1.29	1	0.73	1
FOSL1	16003	70	296	1.29	1	0.73	1
HLTF	16003	139	296	2.57	2	0.73	1
NHLH1	16003	205	296	3.79	3	0.73	1
NRF1	16003	139	296	2.57	2	0.73	1
RELA	16003	140	296	2.59	2	0.73	1
HMGA2	16003	73	296	1.35	1	0.74	1
PROP1	16003	73	296	1.35	1	0.74	1
BHLHE41	16003	74	296	1.37	1	0.75	1
HMBOX1	16003	75	296	1.39	1	0.75	1
HMX2	16003	75	296	1.39	1	0.75	1
PHOX2B	16003	144	296	2.66	2	0.75	1
GATA5	16003	77	296	1.42	1	0.76	1
HNF4A	16003	76	296	1.41	1	0.76	1
RXRB	16003	76	296	1.41	1	0.76	1
MAZ	16003	150	296	2.77	2	0.77	1
PAX2	16003	79	296	1.46	1	0.77	1
PAX7	16003	79	296	1.46	1	0.77	1
SOX13	16003	78	296	1.44	1	0.77	1
FOXO3	16003	154	296	2.85	2	0.78	1
HOXA2	16003	154	296	2.85	2	0.78	1
HOXD8	16003	81	296	1.5	1	0.78	1
VAX2	16003	154	296	2.85	2	0.78	1
BRCA1	16003	157	296	2.9	2	0.79	1
HINFP	16003	353	296	6.53	5	0.79	1
LHX1	16003	84	296	1.55	1	0.79	1
POU2F3	16003	84	296	1.55	1	0.79	1
MZF1	16003	228	296	4.22	3	0.8	1
NR1H2	16003	159	296	2.94	2	0.8	1
ZBTB16	16003	86	296	1.59	1	0.8	1
ZNF148	16003	159	296	2.94	2	0.8	1
SIX3	16003	88	296	1.63	1	0.81	1
TGIF2	16003	369	296	6.83	5	0.82	1
NFIL3	16003	96	296	1.78	1	0.83	1
PBX1	16003	171	296	3.16	2	0.83	1
EBF1	16003	178	296	3.29	2	0.84	1
GLIS2	16003	97	296	1.79	1	0.84	1
MEF2D	16003	99	296	1.83	1	0.84	1
MYOD1	16003	97	296	1.79	1	0.84	1
SOX18	16003	97	296	1.79	1	0.84	1
TBP	16003	101	296	1.87	1	0.85	1
ZNF740	16003	179	296	3.31	2	0.85	1
ARNTL2	16003	187	296	3.46	2	0.86	1
MXD1	16003	106	296	1.96	1	0.86	1
NR2F6	16003	105	296	1.94	1	0.86	1
TLX2	16003	105	296	1.94	1	0.86	1
GBX2	16003	108	296	2	1	0.87	1
HBP1	16003	108	296	2	1	0.87	1
NKX2-5	16003	107	296	1.98	1	0.87	1
POU6F1	16003	263	296	4.86	3	0.87	1
TFCP2	16003	109	296	2.02	1	0.87	1
TRIM28	16003	267	296	4.94	3	0.87	1
WT1	16003	109	296	2.02	1	0.87	1
ASCL2	16003	114	296	2.11	1	0.88	1
CREM	16003	115	296	2.13	1	0.88	1
KLF7	16003	115	296	2.13	1	0.88	1
MYF6	16003	193	296	3.57	2	0.88	1
NFYB	16003	270	296	4.99	3	0.88	1
CDC5L	16003	116	296	2.15	1	0.89	1
ISL1	16003	117	296	2.16	1	0.89	1
PRRX2	16003	120	296	2.22	1	0.89	1
ARNTL	16003	121	296	2.24	1	0.9	1
ETV3	16003	124	296	2.29	1	0.9	1
HIF1A	16003	205	296	3.79	2	0.9	1
THRA	16003	205	296	3.79	2	0.9	1
NFYA	16003	129	296	2.39	1	0.91	1
RFX2	16003	212	296	3.92	2	0.91	1
TFDP1	16003	217	296	4.01	2	0.91	1
ZBTB7B	16003	214	296	3.96	2	0.91	1
PLAG1	16003	133	296	2.46	1	0.92	1
YY1	16003	138	296	2.55	1	0.92	1
MEIS1	16003	233	296	4.31	2	0.93	1
PPARD	16003	140	296	2.59	1	0.93	1
TFAP4	16003	140	296	2.59	1	0.93	1
ELF2	16003	246	296	4.55	2	0.94	1
INSM1	16003	246	296	4.55	2	0.94	1
SMAD2	16003	147	296	2.72	1	0.94	1
SOX7	16003	237	296	4.38	2	0.94	1
ELF4	16003	157	296	2.9	1	0.95	1
RREB1	16003	159	296	2.94	1	0.95	1
E2F4	16003	176	296	3.26	1	0.96	1
GTF2I	16003	167	296	3.09	1	0.96	1
HDX	16003	175	296	3.24	1	0.96	1
RHOXF1	16003	170	296	3.14	1	0.96	1
USF1	16003	170	296	3.14	1	0.96	1
ZBTB33	16003	190	296	3.51	1	0.97	1
EWSR1	16003	197	296	3.64	1	0.98	1
GCM1	16003	207	296	3.83	1	0.98	1
IRF3	16003	210	296	3.88	1	0.98	1
NEUROD1	16003	309	296	5.72	2	0.98	1
RFXANK	16003	211	296	3.9	1	0.98	1
ELK3	16003	242	296	4.48	1	0.99	1
FOXJ3	16003	275	296	5.09	1	0.99	1
HSF2	16003	238	296	4.4	1	0.99	1
MTF1	16003	335	296	6.2	2	0.99	1
SOX15	16003	382	296	7.07	2	0.99	1
ZNF35	16003	245	296	4.53	1	0.99	1
AIRE	16003	254	296	4.7	0	1	1
ALX1	16003	39	296	0.72	0	1	1
ALX3	16003	26	296	0.48	0	1	1
ALX4	16003	53	296	0.98	0	1	1
ARID3A	16003	253	296	4.68	0	1	1
ARID5A	16003	143	296	2.65	0	1	1
ARID5B	16003	39	296	0.72	0	1	1
ATF1	16003	85	296	1.57	0	1	1
ATF2	16003	406	296	7.51	0	1	1
ATF3	16003	18	296	0.33	0	1	1
ATF4	16003	93	296	1.72	0	1	1
ATF7	16003	60	296	1.11	0	1	1
ATOH1	16003	21	296	0.39	0	1	1
BACH1	16003	107	296	1.98	0	1	1
BARX1	16003	80	296	1.48	0	1	1
BARX2	16003	96	296	1.78	0	1	1
BBX	16003	164	296	3.03	0	1	1
BCL6	16003	29	296	0.54	0	1	1
BPTF	16003	295	296	5.46	0	1	1
CDX1	16003	47	296	0.87	0	1	1
CDX2	16003	27	296	0.5	0	1	1
CEBPB	16003	124	296	2.29	0	1	1
CEBPE	16003	38	296	0.7	0	1	1
CLOCK	16003	424	296	7.84	2	1	1
CREB1	16003	63	296	1.17	0	1	1
CRX	16003	145	296	2.68	0	1	1
DBP	16003	97	296	1.79	0	1	1
DDIT3	16003	51	296	0.94	0	1	1
DEAF1	16003	317	296	5.86	1	1	1
DLX3	16003	26	296	0.48	0	1	1
DMRT2	16003	45	296	0.83	0	1	1
DMRT3	16003	39	296	0.72	0	1	1
E4F1	16003	333	296	6.16	0	1	1
EGR2	16003	15	296	0.28	0	1	1
EGR3	16003	28	296	0.52	0	1	1
EGR4	16003	75	296	1.39	0	1	1
ELF3	16003	67	296	1.24	0	1	1
ELF5	16003	27	296	0.5	0	1	1
ELK1	16003	94	296	1.74	0	1	1
EN2	16003	146	296	2.7	0	1	1
EOMES	16003	50	296	0.92	0	1	1
EP300	16003	105	296	1.94	0	1	1
ERF	16003	101	296	1.87	0	1	1
ESX1	16003	64	296	1.18	0	1	1
ETS2	16003	51	296	0.94	0	1	1
ETV6	16003	88	296	1.63	0	1	1
FLI1	16003	89	296	1.65	0	1	1
FOSL2	16003	81	296	1.5	0	1	1
FOXA1	16003	47	296	0.87	0	1	1
FOXA2	16003	51	296	0.94	0	1	1
FOXA3	16003	51	296	0.94	0	1	1
FOXC1	16003	37	296	0.68	0	1	1
FOXG1	16003	22	296	0.41	0	1	1
FOXH1	16003	135	296	2.5	0	1	1
FOXI1	16003	25	296	0.46	0	1	1
FOXK1	16003	40	296	0.74	0	1	1
FOXN1	16003	78	296	1.44	0	1	1
FOXP1	16003	130	296	2.4	0	1	1
FOXP3	16003	125	296	2.31	0	1	1
GABPB1	16003	70	296	1.29	0	1	1
GATA1	16003	59	296	1.09	0	1	1
GATA3	16003	102	296	1.89	0	1	1
GBX1	16003	143	296	2.65	0	1	1
GCM2	16003	192	296	3.55	0	1	1
GFI1	16003	82	296	1.52	0	1	1
GFI1B	16003	50	296	0.92	0	1	1
GLIS1	16003	85	296	1.57	0	1	1
GLIS3	16003	38	296	0.7	0	1	1
GMEB1	16003	99	296	1.83	0	1	1
GSC	16003	30	296	0.55	0	1	1
GSX2	16003	49	296	0.91	0	1	1
GTF2A2	16003	151	296	2.79	0	1	1
HES1	16003	15	296	0.28	0	1	1
HLX	16003	76	296	1.41	0	1	1
HNF4G	16003	52	296	0.96	0	1	1
HOMEZ	16003	186	296	3.44	0	1	1
HOXA13	16003	33	296	0.61	0	1	1
HOXA3	16003	43	296	0.8	0	1	1
HOXB13	16003	40	296	0.74	0	1	1
HOXB3	16003	242	296	4.48	0	1	1
HOXB6	16003	16	296	0.3	0	1	1
HOXB7	16003	26	296	0.48	0	1	1
HOXB8	16003	15	296	0.28	0	1	1
HOXB9	16003	59	296	1.09	0	1	1
HOXC12	16003	31	296	0.57	0	1	1
HOXC13	16003	18	296	0.33	0	1	1
HOXC5	16003	16	296	0.3	0	1	1
HOXC9	16003	27	296	0.5	0	1	1
HOXD12	16003	42	296	0.78	0	1	1
IKZF2	16003	85	296	1.57	0	1	1
IRF1	16003	55	296	1.02	0	1	1
IRF4	16003	145	296	2.68	0	1	1
IRF7	16003	136	296	2.52	0	1	1
IRF9	16003	124	296	2.29	0	1	1
IRX2	16003	16	296	0.3	0	1	1
ISX	16003	42	296	0.78	0	1	1
JDP2	16003	21	296	0.39	0	1	1
JUN	16003	23	296	0.43	0	1	1
JUND	16003	135	296	2.5	0	1	1
KLF12	16003	76	296	1.41	0	1	1
LEF1	16003	27	296	0.5	0	1	1
LHX4	16003	115	296	2.13	0	1	1
LHX5	16003	81	296	1.5	0	1	1
LHX8	16003	49	296	0.91	0	1	1
LMX1A	16003	101	296	1.87	0	1	1
MAFF	16003	80	296	1.48	0	1	1
MAFG	16003	95	296	1.76	0	1	1
MAFK	16003	66	296	1.22	0	1	1
MAX	16003	122	296	2.26	0	1	1
MEF2A	16003	64	296	1.18	0	1	1
MEIS2	16003	52	296	0.96	0	1	1
MSX1	16003	45	296	0.83	0	1	1
MXD3	16003	257	296	4.75	0	1	1
MXI1	16003	147	296	2.72	0	1	1
MYBL1	16003	134	296	2.48	0	1	1
MYF5	16003	62	296	1.15	0	1	1
NANOG	16003	424	296	7.84	2	1	1
NFATC1	16003	53	296	0.98	0	1	1
NFATC2	16003	79	296	1.46	0	1	1
NFATC3	16003	49	296	0.91	0	1	1
NFATC4	16003	35	296	0.65	0	1	1
NFE2	16003	69	296	1.28	0	1	1
NFE2L1	16003	273	296	5.05	0	1	1
NFE2L2	16003	100	296	1.85	0	1	1
NFE2L3	16003	340	296	6.29	0	1	1
NFIB	16003	125	296	2.31	0	1	1
NFKB2	16003	101	296	1.87	0	1	1
NFYC	16003	328	296	6.07	1	1	1
NKX2-1	16003	34	296	0.63	0	1	1
NKX2-2	16003	17	296	0.31	0	1	1
NKX2-8	16003	106	296	1.96	0	1	1
NKX3-2	16003	22	296	0.41	0	1	1
NOBOX	16003	138	296	2.55	0	1	1
NR1I3	16003	65	296	1.2	0	1	1
NR2C2	16003	369	296	6.83	1	1	1
NR2E3	16003	54	296	1	0	1	1
NR2F2	16003	75	296	1.39	0	1	1
NR4A1	16003	23	296	0.43	0	1	1
NR4A2	16003	28	296	0.52	0	1	1
NR6A1	16003	137	296	2.53	0	1	1
OTP	16003	56	296	1.04	0	1	1
OVOL2	16003	66	296	1.22	0	1	1
PARP1	16003	249	296	4.61	0	1	1
PATZ1	16003	154	296	2.85	0	1	1
PAX1	16003	24	296	0.44	0	1	1
PAX3	16003	102	296	1.89	0	1	1
PAX4	16003	62	296	1.15	0	1	1
PAX6	16003	118	296	2.18	0	1	1
PDX1	16003	82	296	1.52	0	1	1
PITX2	16003	75	296	1.39	0	1	1
PKNOX1	16003	125	296	2.31	0	1	1
POU1F1	16003	34	296	0.63	0	1	1
POU2AF1	16003	107	296	1.98	0	1	1
POU2F1	16003	129	296	2.39	0	1	1
POU2F2	16003	663	296	12.26	3	1	1
POU3F4	16003	171	296	3.16	0	1	1
POU4F3	16003	19	296	0.35	0	1	1
RARG	16003	99	296	1.83	0	1	1
RAX	16003	53	296	0.98	0	1	1
RBPJ	16003	71	296	1.31	0	1	1
REL	16003	66	296	1.22	0	1	1
RFX3	16003	126	296	2.33	0	1	1
RFX4	16003	35	296	0.65	0	1	1
RFX7	16003	82	296	1.52	0	1	1
RUNX3	16003	130	296	2.4	0	1	1
SIX2	16003	47	296	0.87	0	1	1
SIX6	16003	66	296	1.22	0	1	1
SMAD1	16003	73	296	1.35	0	1	1
SMAD5	16003	86	296	1.59	0	1	1
SMAD6	16003	38	296	0.7	0	1	1
SOX1	16003	44	296	0.81	0	1	1
SOX14	16003	41	296	0.76	0	1	1
SOX17	16003	31	296	0.57	0	1	1
SOX30	16003	49	296	0.91	0	1	1
SOX5	16003	38	296	0.7	0	1	1
SOX8	16003	59	296	1.09	0	1	1
SP2	16003	72	296	1.33	0	1	1
SP3	16003	147	296	2.72	0	1	1
SP4	16003	326	296	6.03	1	1	1
SPDEF	16003	115	296	2.13	0	1	1
SPIB	16003	47	296	0.87	0	1	1
SPIC	16003	64	296	1.18	0	1	1
SPZ1	16003	31	296	0.57	0	1	1
SRF	16003	57	296	1.05	0	1	1
STAT1	16003	197	296	3.64	0	1	1
STAT2	16003	107	296	1.98	0	1	1
T	16003	76	296	1.41	0	1	1
TAL1	16003	24	296	0.44	0	1	1
TAL2	16003	73	296	1.35	0	1	1
TCF12	16003	62	296	1.15	0	1	1
TCF7L2	16003	70	296	1.29	0	1	1
TEF	16003	43	296	0.8	0	1	1
TFAP2E	16003	383	296	7.08	1	1	1
TFE3	16003	86	296	1.59	0	1	1
TLX1	16003	47	296	0.87	0	1	1
TP53	16003	134	296	2.48	0	1	1
TP63	16003	15	296	0.28	0	1	1
USF2	16003	185	296	3.42	0	1	1
XBP1	16003	274	296	5.07	0	1	1
ZBTB12	16003	50	296	0.92	0	1	1
ZBTB3	16003	149	296	2.76	0	1	1
ZBTB6	16003	72	296	1.33	0	1	1
ZFX	16003	64	296	1.18	0	1	1
ZIC2	16003	42	296	0.78	0	1	1
ZNF143	16003	108	296	2	0	1	1
ZNF281	16003	224	296	4.14	0	1	1
ZNF354C	16003	78	296	1.44	0	1	1
ZNF384	16003	154	296	2.85	0	1	1
ZNF691	16003	123	296	2.28	0	1	1
