# Supplementary material for: Master regulator analysis of paragangliomas carrying SDHx, VHL, or MAML3 genetic alterations
Source: BMC Cancer. 2019 Jun 24;19:619. doi: 10.1186/s12885-019-5813-z (PMC6591808; doi:10.1186/s12885-019-5813-z)
Supplement: Supplementary file 10 — Dataset S10. PPGL regulon overlaps. (CSV 3893 kb) [file 12885_2019_5813_MOESM10_ESM.csv]

Regulon1	Regulon2	Universe.Size	R1.Size	R2.Size	Expected.Overlap	Observed.Overlap	Pvalue	Adjusted.Pvalue
AHR	ARID5A	15934	5479	6913	2377.08	3591	0	0
AHR	ARID5B	15934	5479	4622	1589.3	3727	0	0
AHR	ATF3	15934	5479	3263	1122	2204	0	0
AHR	BACH1	15934	5479	5128	1763.29	3464	0	0
AHR	BCL6	15934	5479	2911	1000.96	2049	0	0
AHR	BCL6B	15934	5479	5362	1843.76	3323	0	0
AHR	CDX1	15934	5479	3646	1253.7	2348	0	0
AHR	DLX3	15934	5479	4801	1650.85	3471	0	0
AHR	DLX4	15934	5479	4239	1457.61	3014	0	0
AHR	EPAS1	15934	5479	5081	1747.13	3373	0	0
AHR	ERG	15934	5479	5359	1842.72	3825	0	0
AHR	ESR1	15934	5479	5003	1720.31	3940	0	0
AHR	ETS1	15934	5479	5459	1877.11	3913	0	0
AHR	ETS2	15934	5479	3500	1203.5	2324	0	0
AHR	ETV6	15934	5479	5446	1872.64	3196	0	0
AHR	FEV	15934	5479	4765	1638.47	3116	0	0
AHR	FLI1	15934	5479	5096	1752.29	3691	0	0
AHR	FOSL2	15934	5479	4280	1471.7	2625	0	0
AHR	FOXC1	15934	5479	6064	2085.14	3993	0	0
AHR	FOXD1	15934	5479	5932	2039.75	3838	0	0
AHR	FOXF2	15934	5479	3774	1297.71	2656	0	0
AHR	FOXL1	15934	5479	5470	1880.89	3331	0	0
AHR	FOXO1	15934	5479	5880	2021.87	4285	0	0
AHR	FOXO4	15934	5479	5076	1745.41	3002	0	0
AHR	GATA6	15934	5479	5780	1987.49	3367	0	0
AHR	GLI1	15934	5479	4190	1440.76	2574	0	0
AHR	GLI3	15934	5479	5828	2003.99	4490	0	0
AHR	GLIS3	15934	5479	4828	1660.14	3727	0	0
AHR	HES1	15934	5479	5367	1845.47	3468	0	0
AHR	HOXB5	15934	5479	1869	642.67	1427	0	0
AHR	HOXB9	15934	5479	2524	867.89	1737	0	0
AHR	IRF8	15934	5479	3317	1140.57	2194	0	0
AHR	JDP2	15934	5479	3355	1153.64	2482	0	0
AHR	JUN	15934	5479	2019	694.25	1590	0	0
AHR	KLF4	15934	5479	4672	1606.49	3590	0	0
AHR	LEF1	15934	5479	6205	2133.63	4168	0	0
AHR	LHX6	15934	5479	3019	1038.1	2207	0	0
AHR	MAF	15934	5479	5117	1759.51	3862	0	0
AHR	MAFB	15934	5479	3852	1324.53	2974	0	0
AHR	MAFF	15934	5479	4785	1645.35	2882	0	0
AHR	MAFK	15934	5479	6621	2276.67	4146	0	0
AHR	MECOM	15934	5479	3737	1284.99	2392	0	0
AHR	MEF2C	15934	5479	5675	1951.38	4243	0	0
AHR	MITF	15934	5479	3542	1217.94	2615	0	0
AHR	MSX2	15934	5479	5128	1763.29	3338	0	0
AHR	MYC	15934	5479	5658	1945.54	3708	0	0
AHR	NFATC1	15934	5479	6432	2211.68	4227	0	0
AHR	NFIA	15934	5479	6056	2082.39	3263	0	0
AHR	NFIB	15934	5479	6764	2325.84	4210	0	0
AHR	NFIL3	15934	5479	5966	2051.44	3863	0	0
AHR	NR2F2	15934	5479	4641	1595.84	3839	0	0
AHR	NR5A2	15934	5479	4050	1392.62	2739	0	0
AHR	OSR1	15934	5479	3640	1251.64	2659	0	0
AHR	OSR2	15934	5479	6057	2082.74	3869	0	0
AHR	PGR	15934	5479	5476	1882.95	4190	0	0
AHR	PKNOX2	15934	5479	2908	999.93	2006	0	0
AHR	PLAGL1	15934	5479	5843	2009.15	4001	0	0
AHR	PPARG	15934	5479	4861	1671.48	2935	0	0
AHR	PRDM1	15934	5479	4678	1608.56	3339	0	0
AHR	PRRX1	15934	5479	5303	1823.47	4000	0	0
AHR	PRRX2	15934	5479	6687	2299.36	3484	0	0
AHR	RARB	15934	5479	2394	823.19	1911	0	0
AHR	RUNX3	15934	5479	3776	1298.4	2687	0	0
AHR	SIX1	15934	5479	2957	1016.78	1939	0	0
AHR	SMAD6	15934	5479	4865	1672.86	3236	0	0
AHR	SOX13	15934	5479	4789	1646.73	3847	0	0
AHR	SOX17	15934	5479	5108	1756.42	2915	0	0
AHR	SOX21	15934	5479	2310	794.31	1644	0	0
AHR	SOX6	15934	5479	1864	640.95	1507	0	0
AHR	SOX8	15934	5479	4248	1460.7	2576	0	0
AHR	STAT3	15934	5479	3635	1249.92	2421	0	0
AHR	TAL1	15934	5479	5037	1732	3298	0	0
AHR	TBX18	15934	5479	4713	1620.59	4057	0	0
AHR	TFAP2C	15934	5479	4648	1598.24	2923	0	0
AHR	TGIF1	15934	5479	6781	2331.69	4158	0	0
AHR	TGIF2	15934	5479	7192	2473.01	4678	0	0
AHR	THRB	15934	5479	3633	1249.23	2531	0	0
AHR	TLX2	15934	5479	3091	1062.86	2149	0	0
AHR	TP63	15934	5479	1888	649.2	1717	0	0
AHR	WT1	15934	5479	2257	776.08	1718	0	0
ALX3	AR	15934	4849	4953	1507.29	2872	0	0
ALX3	ARNTL2	15934	4849	5540	1685.92	3408	0	0
ALX3	ATF1	15934	4849	4522	1376.13	2783	0	0
ALX3	ATF2	15934	4849	7145	2174.35	4299	0	0
ALX3	ATF4	15934	4849	5019	1527.37	3362	0	0
ALX3	ATF5	15934	4849	3064	932.43	2178	0	0
ALX3	ATF7	15934	4849	4952	1506.98	3382	0	0
ALX3	BBX	15934	4849	6424	1954.94	3291	0	0
ALX3	BPTF	15934	4849	7193	2188.96	4237	0	0
ALX3	BRCA1	15934	4849	4229	1286.96	2899	0	0
ALX3	CDC5L	15934	4849	3952	1202.66	2251	0	0
ALX3	CEBPB	15934	4849	7021	2136.62	3242	0	0
ALX3	CLOCK	15934	4849	7033	2140.27	4073	0	0
ALX3	CREB1	15934	4849	6109	1859.08	4132	0	0
ALX3	CTCF	15934	4849	5700	1734.61	3757	0	0
ALX3	DDIT3	15934	4849	3431	1044.11	2171	0	0
ALX3	E2F5	15934	4849	3950	1202.06	2544	0	0
ALX3	E4F1	15934	4849	5872	1786.95	3604	0	0
ALX3	ELF1	15934	4849	5875	1787.87	3009	0	0
ALX3	ELK3	15934	4849	6393	1945.5	3836	0	0
ALX3	ELK4	15934	4849	5091	1549.28	3167	0	0
ALX3	EP300	15934	4849	5392	1640.88	3886	0	0
ALX3	ESRRA	15934	4849	3587	1091.59	2341	0	0
ALX3	ETV3	15934	4849	6650	2023.71	4029	0	0
ALX3	FOXH1	15934	4849	4295	1307.04	2370	0	0
ALX3	FOXJ3	15934	4849	4035	1227.92	2301	0	0
ALX3	FOXK1	15934	4849	3826	1164.32	2818	0	0
ALX3	FOXO3	15934	4849	3554	1081.55	2241	0	0
ALX3	GABPA	15934	4849	3781	1150.63	2705	0	0
ALX3	GABPB1	15934	4849	3508	1067.55	2089	0	0
ALX3	GMEB1	15934	4849	5321	1619.28	3208	0	0
ALX3	GTF2A2	15934	4849	3950	1202.06	2571	0	0
ALX3	GTF2I	15934	4849	6644	2021.89	4340	0	0
ALX3	HDX	15934	4849	6872	2091.27	3816	0	0
ALX3	HLTF	15934	4849	5234	1592.8	3021	0	0
ALX3	HMBOX1	15934	4849	5057	1538.94	2695	0	0
ALX3	HOXA6	15934	4849	3797	1155.49	2548	0	0
ALX3	HSF1	15934	4849	4003	1218.18	2481	0	0
ALX3	IKZF2	15934	4849	3158	961.04	1975	0	0
ALX3	IRF3	15934	4849	6529	1986.89	3646	0	0
ALX3	IRF7	15934	4849	4515	1373.99	2854	0	0
ALX3	JUND	15934	4849	5169	1573.02	3598	0	0
ALX3	KLF12	15934	4849	4247	1292.44	2763	0	0
ALX3	KLF7	15934	4849	6391	1944.9	3897	0	0
ALX3	LHX4	15934	4849	2906	884.35	1864	0	0
ALX3	MAFG	15934	4849	4981	1515.81	3102	0	0
ALX3	MAX	15934	4849	3125	950.99	2134	0	0
ALX3	MEF2A	15934	4849	5629	1713	3682	0	0
ALX3	MSX1	15934	4849	3665	1115.32	2407	0	0
ALX3	MTF1	15934	4849	5479	1667.36	2841	0	0
ALX3	MXD1	15934	4849	3566	1085.2	2178	0	0
ALX3	MXD3	15934	4849	6186	1882.51	4026	0	0
ALX3	NFATC2	15934	4849	6108	1858.77	3225	0	0
ALX3	NFE2L1	15934	4849	4134	1258.05	2326	0	0
ALX3	NFE2L2	15934	4849	4690	1427.25	2771	0	0
ALX3	NFIC	15934	4849	6411	1950.98	3595	0	0
ALX3	NFYA	15934	4849	3739	1137.84	2300	0	0
ALX3	NR1H2	15934	4849	6180	1880.68	3576	0	0
ALX3	NR1I3	15934	4849	4079	1241.31	2384	0	0
ALX3	NR2C2	15934	4849	7461	2270.52	4013	0	0
ALX3	NR2E3	15934	4849	3809	1159.15	2625	0	0
ALX3	NR2F6	15934	4849	5797	1764.13	3327	0	0
ALX3	NR3C1	15934	4849	4372	1330.48	2484	0	0
ALX3	PARP1	15934	4849	4491	1366.69	3114	0	0
ALX3	POU2F1	15934	4849	4726	1438.21	3096	0	0
ALX3	POU4F3	15934	4849	1853	563.9	1654	0	0
ALX3	RBPJ	15934	4849	5590	1701.14	3484	0	0
ALX3	REL	15934	4849	5956	1812.52	3652	0	0
ALX3	REST	15934	4849	6798	2068.75	3311	0	0
ALX3	RFX3	15934	4849	6203	1887.68	4149	0	0
ALX3	RFX7	15934	4849	5655	1720.92	3184	0	0
ALX3	RFXANK	15934	4849	6553	1994.19	3807	0	0
ALX3	RREB1	15934	4849	5786	1760.78	3242	0	0
ALX3	SATB1	15934	4849	6040	1838.08	2961	0	0
ALX3	SMAD1	15934	4849	3377	1027.68	2013	0	0
ALX3	SMAD4	15934	4849	4951	1506.68	2944	0	0
ALX3	SMAD5	15934	4849	5433	1653.36	3471	0	0
ALX3	SMAD9	15934	4849	5740	1746.78	4103	0	0
ALX3	SOX5	15934	4849	4678	1423.6	3348	0	0
ALX3	SP2	15934	4849	4610	1402.91	3609	0	0
ALX3	SP3	15934	4849	6974	2122.31	4120	0	0
ALX3	SP4	15934	4849	7577	2305.82	3611	0	0
ALX3	TCF12	15934	4849	5461	1661.88	3571	0	0
ALX3	TEAD1	15934	4849	6741	2051.41	3781	0	0
ALX3	TFCP2	15934	4849	5711	1737.96	4153	0	0
ALX3	TFDP1	15934	4849	3905	1188.36	2642	0	0
ALX3	USF1	15934	4849	5916	1800.34	3886	0	0
ALX3	USF2	15934	4849	5429	1652.14	3373	0	0
ALX3	YY1	15934	4849	4314	1312.83	2427	0	0
ALX3	ZBTB33	15934	4849	5625	1711.79	3311	0	0
ALX3	ZBTB6	15934	4849	6193	1884.64	3202	0	0
ALX3	ZEB1	15934	4849	6373	1939.42	3352	0	0
ALX3	ZFX	15934	4849	5405	1644.84	3796	0	0
ALX3	ZNF143	15934	4849	3633	1105.59	2293	0	0
ALX3	ZNF281	15934	4849	6743	2052.01	4454	0	0
ALX3	ZNF354C	15934	4849	5957	1812.82	4151	0	0
ALX3	ZNF628	15934	4849	5135	1562.67	2933	0	0
ALX3	ZNF8	15934	4849	4508	1371.86	2491	0	0
ALX4	CDX2	15934	959	834	50.19	588	0	0
ALX4	FOXA2	15934	959	694	41.77	447	0	0
ALX4	HOXD12	15934	959	1011	60.85	606	0	0
ALX4	NKX2-1	15934	959	984	59.22	651	0	0
ALX4	PDX1	15934	959	1155	69.51	587	0	0
ALX4	POU3F4	15934	959	991	59.64	667	0	0
ALX4	RFX4	15934	959	826	49.71	514	0	0
AR	ATF1	15934	4953	4522	1405.64	2842	0	0
AR	ATF2	15934	4953	7145	2220.99	3617	0	0
AR	ATF4	15934	4953	5019	1560.13	2733	0	0
AR	ATF7	15934	4953	4952	1539.3	2658	0	0
AR	BBX	15934	4953	6424	1996.87	3291	0	0
AR	CLOCK	15934	4953	7033	2186.17	3549	0	0
AR	DBP	15934	4953	3377	1049.72	1997	0	0
AR	DDIT3	15934	4953	3431	1066.51	2590	0	0
AR	E2F4	15934	4953	3405	1058.43	2195	0	0
AR	E4F1	15934	4953	5872	1825.28	3809	0	0
AR	ELF1	15934	4953	5875	1826.21	3894	0	0
AR	ELK3	15934	4953	6393	1987.23	3888	0	0
AR	ELK4	15934	4953	5091	1582.51	3522	0	0
AR	EP300	15934	4953	5392	1676.07	3141	0	0
AR	ETV3	15934	4953	6650	2067.12	3732	0	0
AR	FOXH1	15934	4953	4295	1335.08	2981	0	0
AR	FOXK1	15934	4953	3826	1189.29	2496	0	0
AR	GABPB1	15934	4953	3508	1090.44	2213	0	0
AR	GMEB1	15934	4953	5321	1654	3484	0	0
AR	GTF2A2	15934	4953	3950	1227.84	2827	0	0
AR	GTF2I	15934	4953	6644	2065.25	3580	0	0
AR	HIF1A	15934	4953	5951	1849.84	3489	0	0
AR	HLTF	15934	4953	5234	1626.96	3086	0	0
AR	HMBOX1	15934	4953	5057	1571.94	3072	0	0
AR	HOXA6	15934	4953	3797	1180.28	2178	0	0
AR	HOXB3	15934	4953	4344	1350.31	2419	0	0
AR	HSF1	15934	4953	4003	1244.31	2285	0	0
AR	JUND	15934	4953	5169	1606.76	2889	0	0
AR	KLF11	15934	4953	4286	1332.28	2387	0	0
AR	KLF7	15934	4953	6391	1986.61	3439	0	0
AR	MAX	15934	4953	3125	971.39	2217	0	0
AR	MAZ	15934	4953	5582	1735.14	3084	0	0
AR	MEF2A	15934	4953	5629	1749.75	3833	0	0
AR	MTF1	15934	4953	5479	1703.12	3508	0	0
AR	MXD3	15934	4953	6186	1922.89	3812	0	0
AR	MZF1	15934	4953	5247	1631	3145	0	0
AR	NFATC2	15934	4953	6108	1898.64	4024	0	0
AR	NFE2L2	15934	4953	4690	1457.86	3043	0	0
AR	NFIC	15934	4953	6411	1992.83	3665	0	0
AR	NFKB1	15934	4953	6135	1907.03	3542	0	0
AR	NR1I3	15934	4953	4079	1267.94	2885	0	0
AR	NR2E3	15934	4953	3809	1184.01	2803	0	0
AR	NR2F6	15934	4953	5797	1801.97	3815	0	0
AR	PARP1	15934	4953	4491	1396	2477	0	0
AR	PBX1	15934	4953	3918	1217.89	2336	0	0
AR	POU2F1	15934	4953	4726	1469.05	3163	0	0
AR	PPARA	15934	4953	3768	1171.26	2252	0	0
AR	RBPJ	15934	4953	5590	1737.62	3090	0	0
AR	REL	15934	4953	5956	1851.39	3555	0	0
AR	REST	15934	4953	6798	2113.12	4220	0	0
AR	RFX3	15934	4953	6203	1928.17	3269	0	0
AR	RFXANK	15934	4953	6553	2036.97	3508	0	0
AR	RREB1	15934	4953	5786	1798.55	3524	0	0
AR	SMAD9	15934	4953	5740	1784.25	2929	0	0
AR	SOX5	15934	4953	4678	1454.13	2740	0	0
AR	SP2	15934	4953	4610	1432.99	2812	0	0
AR	TCF12	15934	4953	5461	1697.52	3586	0	0
AR	TFCP2	15934	4953	5711	1775.23	2967	0	0
AR	TFEB	15934	4953	4597	1428.95	2974	0	0
AR	USF1	15934	4953	5916	1838.96	2988	0	0
AR	USF2	15934	4953	5429	1687.58	3689	0	0
AR	ZBTB16	15934	4953	2489	773.69	2010	0	0
AR	ZBTB33	15934	4953	5625	1748.5	2879	0	0
AR	ZFX	15934	4953	5405	1680.12	3187	0	0
AR	ZNF143	15934	4953	3633	1129.3	2249	0	0
AR	ZNF148	15934	4953	3236	1005.89	2155	0	0
AR	ZNF281	15934	4953	6743	2096.03	3639	0	0
AR	ZNF354C	15934	4953	5957	1851.7	3208	0	0
AR	ZNF628	15934	4953	5135	1596.19	2835	0	0
ARID3A	E2F5	15934	3342	3950	828.47	1845	0	0
ARID3A	FOXJ2	15934	3342	4354	913.21	2156	0	0
ARID3A	TFDP1	15934	3342	3905	819.04	1808	0	0
ARID5A	ARID5B	15934	6913	4622	2005.26	3378	0	0
ARID5A	ASCL2	15934	6913	3075	1334.1	2427	0	0
ARID5A	ATF3	15934	6913	3263	1415.66	2711	0	0
ARID5A	BARX1	15934	6913	2635	1143.2	2300	0	0
ARID5A	BBX	15934	6913	6424	2787.07	3992	0	0
ARID5A	BCL6B	15934	6913	5362	2326.32	4539	0	0
ARID5A	BHLHE41	15934	6913	3835	1663.82	3102	0	0
ARID5A	BPTF	15934	6913	7193	3120.7	4531	0	0
ARID5A	BRCA1	15934	6913	4229	1834.76	2934	0	0
ARID5A	CDX1	15934	6913	3646	1581.82	3428	0	0
ARID5A	CEBPB	15934	6913	7021	3046.08	4866	0	0
ARID5A	CEBPD	15934	6913	7119	3088.59	5349	0	0
ARID5A	CEBPE	15934	6913	2691	1167.5	2254	0	0
ARID5A	DLX3	15934	6913	4801	2082.92	3625	0	0
ARID5A	DLX5	15934	6913	4589	1990.95	3351	0	0
ARID5A	DMRT3	15934	6913	1712	742.75	1481	0	0
ARID5A	ERG	15934	6913	5359	2325.01	4034	0	0
ARID5A	ESR1	15934	6913	5003	2170.56	3758	0	0
ARID5A	ETS2	15934	6913	3500	1518.48	2723	0	0
ARID5A	ETV6	15934	6913	5446	2362.76	4010	0	0
ARID5A	FLI1	15934	6913	5096	2210.91	4136	0	0
ARID5A	FOSL1	15934	6913	5442	2361.02	4504	0	0
ARID5A	FOXC1	15934	6913	6064	2630.88	4970	0	0
ARID5A	FOXD1	15934	6913	5932	2573.61	4893	0	0
ARID5A	FOXF1	15934	6913	3203	1389.63	2378	0	0
ARID5A	FOXF2	15934	6913	3774	1637.36	3300	0	0
ARID5A	FOXL1	15934	6913	5470	2373.17	4471	0	0
ARID5A	GATA1	15934	6913	1505	652.95	1378	0	0
ARID5A	GLI1	15934	6913	4190	1817.84	3162	0	0
ARID5A	GLI3	15934	6913	5828	2528.49	3840	0	0
ARID5A	HDX	15934	6913	6872	2981.43	4282	0	0
ARID5A	HES1	15934	6913	5367	2328.48	4701	0	0
ARID5A	HIC1	15934	6913	5409	2346.71	4696	0	0
ARID5A	HLX	15934	6913	6419	2784.9	5785	0	0
ARID5A	HOXA6	15934	6913	3797	1647.34	2756	0	0
ARID5A	HOXB9	15934	6913	2524	1095.04	2183	0	0
ARID5A	HOXD9	15934	6913	4526	1963.61	3430	0	0
ARID5A	IRF1	15934	6913	3168	1374.44	2629	0	0
ARID5A	IRF3	15934	6913	6529	2832.62	4089	0	0
ARID5A	IRF6	15934	6913	3660	1587.9	3060	0	0
ARID5A	IRX2	15934	6913	1752	760.11	1615	0	0
ARID5A	JDP2	15934	6913	3355	1455.57	3143	0	0
ARID5A	LEF1	15934	6913	6205	2692.05	4792	0	0
ARID5A	LHX6	15934	6913	3019	1309.8	2541	0	0
ARID5A	LMO2	15934	6913	4917	2133.25	4158	0	0
ARID5A	MAF	15934	6913	5117	2220.02	4100	0	0
ARID5A	MAFF	15934	6913	4785	2075.98	3641	0	0
ARID5A	MAFK	15934	6913	6621	2872.54	5137	0	0
ARID5A	MECP2	15934	6913	7165	3108.55	5155	0	0
ARID5A	MEF2C	15934	6913	5675	2462.11	4526	0	0
ARID5A	MSX1	15934	6913	3665	1590.07	2597	0	0
ARID5A	MSX2	15934	6913	5128	2224.79	4042	0	0
ARID5A	MYBL1	15934	6913	5204	2257.77	3980	0	0
ARID5A	NFATC1	15934	6913	6432	2790.54	5420	0	0
ARID5A	NFATC4	15934	6913	4877	2115.9	4084	0	0
ARID5A	NFE2	15934	6913	2137	927.14	1964	0	0
ARID5A	NFE2L1	15934	6913	4134	1793.54	2964	0	0
ARID5A	NFIA	15934	6913	6056	2627.41	3998	0	0
ARID5A	NFIB	15934	6913	6764	2934.58	5356	0	0
ARID5A	NFIL3	15934	6913	5966	2588.36	3807	0	0
ARID5A	NFKB2	15934	6913	7096	3078.61	5605	0	0
ARID5A	NR1H2	15934	6913	6180	2681.21	3863	0	0
ARID5A	NR1H3	15934	6913	6228	2702.03	4081	0	0
ARID5A	NR1I2	15934	6913	4839	2099.41	3389	0	0
ARID5A	NR2C2	15934	6913	7461	3236.97	4844	0	0
ARID5A	NR2F2	15934	6913	4641	2013.51	3353	0	0
ARID5A	NR6A1	15934	6913	4089	1774.02	3033	0	0
ARID5A	OSR2	15934	6913	6057	2627.84	4227	0	0
ARID5A	PPARG	15934	6913	4861	2108.96	4443	0	0
ARID5A	PRDM1	15934	6913	4678	2029.56	3446	0	0
ARID5A	PRRX1	15934	6913	5303	2300.72	4348	0	0
ARID5A	PRRX2	15934	6913	6687	2901.17	5446	0	0
ARID5A	RELA	15934	6913	4982	2161.45	4078	0	0
ARID5A	RFX5	15934	6913	6898	2992.71	5144	0	0
ARID5A	RFX7	15934	6913	5655	2453.43	4144	0	0
ARID5A	RUNX3	15934	6913	3776	1638.23	3176	0	0
ARID5A	SATB1	15934	6913	6040	2620.47	4098	0	0
ARID5A	SMAD4	15934	6913	4951	2148	3548	0	0
ARID5A	SMAD5	15934	6913	5433	2357.12	3503	0	0
ARID5A	SMAD6	15934	6913	4865	2110.69	3898	0	0
ARID5A	SOX13	15934	6913	4789	2077.72	3266	0	0
ARID5A	SOX17	15934	6913	5108	2216.12	4664	0	0
ARID5A	SOX18	15934	6913	6199	2689.45	5419	0	0
ARID5A	SOX21	15934	6913	2310	1002.2	1881	0	0
ARID5A	SOX8	15934	6913	4248	1843	3411	0	0
ARID5A	SP4	15934	6913	7577	3287.3	5364	0	0
ARID5A	SPI1	15934	6913	5223	2266.01	3972	0	0
ARID5A	SRF	15934	6913	2392	1037.77	1918	0	0
ARID5A	TAL1	15934	6913	5037	2185.31	4577	0	0
ARID5A	TBX15	15934	6913	4029	1747.99	2993	0	0
ARID5A	TBX18	15934	6913	4713	2044.75	3281	0	0
ARID5A	TFAP2C	15934	6913	4648	2016.54	3173	0	0
ARID5A	TGIF1	15934	6913	6781	2941.95	5095	0	0
ARID5A	TGIF2	15934	6913	7192	3120.26	5333	0	0
ARID5A	TP53	15934	6913	3254	1411.75	2647	0	0
ARID5A	VSX1	15934	6913	5685	2466.45	4165	0	0
ARID5A	ZBTB6	15934	6913	6193	2686.85	4821	0	0
ARID5A	ZBTB7A	15934	6913	5551	2408.31	4036	0	0
ARID5B	ATF3	15934	4622	3263	946.5	2528	0	0
ARID5B	BACH1	15934	4622	5128	1487.49	3240	0	0
ARID5B	BCL6	15934	4622	2911	844.4	2046	0	0
ARID5B	BCL6B	15934	4622	5362	1555.36	3368	0	0
ARID5B	BHLHE40	15934	4622	3095	897.77	2252	0	0
ARID5B	CDX1	15934	4622	3646	1057.6	2109	0	0
ARID5B	CEBPE	15934	4622	2691	780.58	1729	0	0
ARID5B	DLX3	15934	4622	4801	1392.63	2660	0	0
ARID5B	DLX4	15934	4622	4239	1229.61	2321	0	0
ARID5B	DMRT3	15934	4622	1712	496.6	1292	0	0
ARID5B	EGR3	15934	4622	2485	720.83	1643	0	0
ARID5B	EPAS1	15934	4622	5081	1473.85	2846	0	0
ARID5B	ERG	15934	4622	5359	1554.49	3543	0	0
ARID5B	ESR1	15934	4622	5003	1451.23	3108	0	0
ARID5B	ETS1	15934	4622	5459	1583.5	3710	0	0
ARID5B	ETS2	15934	4622	3500	1015.25	2408	0	0
ARID5B	ETV6	15934	4622	5446	1579.73	2757	0	0
ARID5B	FEV	15934	4622	4765	1382.19	2520	0	0
ARID5B	FLI1	15934	4622	5096	1478.2	3344	0	0
ARID5B	FOSB	15934	4622	1597	463.24	1172	0	0
ARID5B	FOSL1	15934	4622	5442	1578.57	2672	0	0
ARID5B	FOSL2	15934	4622	4280	1241.51	2395	0	0
ARID5B	FOXC1	15934	4622	6064	1758.99	3682	0	0
ARID5B	FOXD1	15934	4622	5932	1720.7	3141	0	0
ARID5B	FOXF2	15934	4622	3774	1094.73	2449	0	0
ARID5B	FOXL1	15934	4622	5470	1586.69	3041	0	0
ARID5B	FOXO1	15934	4622	5880	1705.62	3542	0	0
ARID5B	GFI1B	15934	4622	1639	475.43	1260	0	0
ARID5B	GLI3	15934	4622	5828	1690.54	3465	0	0
ARID5B	GLIS3	15934	4622	4828	1400.47	3144	0	0
ARID5B	HES1	15934	4622	5367	1556.81	3007	0	0
ARID5B	HIC1	15934	4622	5409	1569	2809	0	0
ARID5B	HINFP	15934	4622	3438	997.27	1990	0	0
ARID5B	HLX	15934	4622	6419	1861.97	2944	0	0
ARID5B	IRF1	15934	4622	3168	918.95	2030	0	0
ARID5B	IRF4	15934	4622	3034	880.08	2054	0	0
ARID5B	IRF8	15934	4622	3317	962.17	2204	0	0
ARID5B	IRX2	15934	4622	1752	508.21	1271	0	0
ARID5B	JDP2	15934	4622	3355	973.19	2525	0	0
ARID5B	JUN	15934	4622	2019	585.65	1477	0	0
ARID5B	KLF4	15934	4622	4672	1355.21	3146	0	0
ARID5B	LEF1	15934	4622	6205	1799.89	3203	0	0
ARID5B	LHX6	15934	4622	3019	875.73	2080	0	0
ARID5B	MAF	15934	4622	5117	1484.3	3437	0	0
ARID5B	MAFB	15934	4622	3852	1117.36	2778	0	0
ARID5B	MAFF	15934	4622	4785	1387.99	3012	0	0
ARID5B	MAFK	15934	4622	6621	1920.56	3604	0	0
ARID5B	MECOM	15934	4622	3737	1084	2285	0	0
ARID5B	MEF2C	15934	4622	5675	1646.16	3460	0	0
ARID5B	MITF	15934	4622	3542	1027.43	2130	0	0
ARID5B	MSX2	15934	4622	5128	1487.49	2676	0	0
ARID5B	MYC	15934	4622	5658	1641.22	3605	0	0
ARID5B	NFATC1	15934	4622	6432	1865.74	3772	0	0
ARID5B	NFE2	15934	4622	2137	619.88	1535	0	0
ARID5B	NFIB	15934	4622	6764	1962.04	3388	0	0
ARID5B	NFIL3	15934	4622	5966	1730.57	3571	0	0
ARID5B	NR2F2	15934	4622	4641	1346.22	3092	0	0
ARID5B	NR5A2	15934	4622	4050	1174.79	2732	0	0
ARID5B	OSR2	15934	4622	6057	1756.96	3038	0	0
ARID5B	PGR	15934	4622	5476	1588.43	3133	0	0
ARID5B	PLAGL1	15934	4622	5843	1694.89	2888	0	0
ARID5B	PPARG	15934	4622	4861	1410.04	2814	0	0
ARID5B	PRDM1	15934	4622	4678	1356.95	3458	0	0
ARID5B	PRRX1	15934	4622	5303	1538.25	3504	0	0
ARID5B	RARB	15934	4622	2394	694.43	1763	0	0
ARID5B	RUNX3	15934	4622	3776	1095.31	2825	0	0
ARID5B	SMAD6	15934	4622	4865	1411.2	2499	0	0
ARID5B	SOX13	15934	4622	4789	1389.15	2971	0	0
ARID5B	SOX17	15934	4622	5108	1481.69	2973	0	0
ARID5B	SOX21	15934	4622	2310	670.07	1616	0	0
ARID5B	SOX6	15934	4622	1864	540.69	1296	0	0
ARID5B	STAT3	15934	4622	3635	1054.41	2528	0	0
ARID5B	TAL1	15934	4622	5037	1461.09	2960	0	0
ARID5B	TBX15	15934	4622	4029	1168.7	2211	0	0
ARID5B	TBX18	15934	4622	4713	1367.11	3411	0	0
ARID5B	TGIF1	15934	4622	6781	1966.98	3690	0	0
ARID5B	TGIF2	15934	4622	7192	2086.19	3853	0	0
ARID5B	TP63	15934	4622	1888	547.66	1508	0	0
ARID5B	WT1	15934	4622	2257	654.69	1801	0	0
ARNT	GABPB1	15934	2888	3508	635.82	1526	0	0
ARNT	ZNF148	15934	2888	3236	586.52	1456	0	0
ARNT2	ARNTL2	15934	3946	5540	1371.96	2536	0	0
ARNT2	BHLHE41	15934	3946	3835	949.72	1884	0	0
ARNT2	BPTF	15934	3946	7193	1781.32	3127	0	0
ARNT2	BRCA1	15934	3946	4229	1047.3	2054	0	0
ARNT2	CEBPB	15934	3946	7021	1738.73	3129	0	0
ARNT2	CEBPD	15934	3946	7119	1763	3033	0	0
ARNT2	CREM	15934	3946	4692	1161.96	2294	0	0
ARNT2	ETV6	15934	3946	5446	1348.68	2458	0	0
ARNT2	EWSR1	15934	3946	4241	1050.27	2393	0	0
ARNT2	FOSL1	15934	3946	5442	1347.69	2517	0	0
ARNT2	HES1	15934	3946	5367	1329.12	2384	0	0
ARNT2	MECP2	15934	3946	7165	1774.39	2860	0	0
ARNT2	MXD1	15934	3946	3566	883.11	1843	0	0
ARNT2	NFATC4	15934	3946	4877	1207.77	2309	0	0
ARNT2	NFIA	15934	3946	6056	1499.75	2996	0	0
ARNT2	NFKB2	15934	3946	7096	1757.3	3296	0	0
ARNT2	NR1H2	15934	3946	6180	1530.46	2889	0	0
ARNT2	RFX7	15934	3946	5655	1400.44	2509	0	0
ARNT2	SMAD4	15934	3946	4951	1226.1	2475	0	0
ARNT2	SMAD9	15934	3946	5740	1421.49	2512	0	0
ARNT2	SP3	15934	3946	6974	1727.09	2787	0	0
ARNT2	TEAD1	15934	3946	6741	1669.39	3057	0	0
ARNT2	ZBTB6	15934	3946	6193	1533.68	2902	0	0
ARNT2	ZBTB7A	15934	3946	5551	1374.69	2452	0	0
ARNT2	ZNF8	15934	3946	4508	1116.39	2299	0	0
ARNTL	CEBPG	15934	2376	2576	384.12	1148	0	0
ARNTL	EHF	15934	2376	3464	516.53	1407	0	0
ARNTL	ESR2	15934	2376	3157	470.76	1430	0	0
ARNTL	FOXO4	15934	2376	5076	756.91	1631	0	0
ARNTL	GZF1	15934	2376	3400	506.99	1280	0	0
ARNTL	HAND2	15934	2376	4472	666.84	1567	0	0
ARNTL	HBP1	15934	2376	3267	487.16	1417	0	0
ARNTL	HNF4A	15934	2376	2037	303.75	977	0	0
ARNTL	INSM1	15934	2376	4477	667.59	1519	0	0
ARNTL	RORA	15934	2376	4211	627.92	1556	0	0
ARNTL	TFE3	15934	2376	2741	408.72	1332	0	0
ARNTL2	ATF2	15934	5540	7145	2484.2	4334	0	0
ARNTL2	ATF4	15934	5540	5019	1745.03	3532	0	0
ARNTL2	ATF5	15934	5540	3064	1065.3	2470	0	0
ARNTL2	ATF7	15934	5540	4952	1721.73	3083	0	0
ARNTL2	BBX	15934	5540	6424	2233.52	3394	0	0
ARNTL2	BPTF	15934	5540	7193	2500.89	4470	0	0
ARNTL2	BRCA1	15934	5540	4229	1470.36	3075	0	0
ARNTL2	CDC5L	15934	5540	3952	1374.05	2541	0	0
ARNTL2	CEBPB	15934	5540	7021	2441.09	4405	0	0
ARNTL2	CEBPD	15934	5540	7119	2475.16	3960	0	0
ARNTL2	CLOCK	15934	5540	7033	2445.26	4193	0	0
ARNTL2	CREB1	15934	5540	6109	2124	4136	0	0
ARNTL2	CTCF	15934	5540	5700	1981.8	3856	0	0
ARNTL2	E4F1	15934	5540	5872	2041.6	3326	0	0
ARNTL2	ELK3	15934	5540	6393	2222.75	3418	0	0
ARNTL2	ELK4	15934	5540	5091	1770.06	2982	0	0
ARNTL2	EP300	15934	5540	5392	1874.71	3285	0	0
ARNTL2	ESRRA	15934	5540	3587	1247.14	2607	0	0
ARNTL2	ETV3	15934	5540	6650	2312.1	4016	0	0
ARNTL2	EWSR1	15934	5540	4241	1474.53	3168	0	0
ARNTL2	FOXK1	15934	5540	3826	1330.24	2454	0	0
ARNTL2	GABPA	15934	5540	3781	1314.59	2365	0	0
ARNTL2	GTF2I	15934	5540	6644	2310.01	4157	0	0
ARNTL2	HDX	15934	5540	6872	2389.29	4388	0	0
ARNTL2	HOXA6	15934	5540	3797	1320.16	2521	0	0
ARNTL2	IRF3	15934	5540	6529	2270.03	4255	0	0
ARNTL2	JUND	15934	5540	5169	1797.18	3278	0	0
ARNTL2	KLF12	15934	5540	4247	1476.61	3310	0	0
ARNTL2	KLF7	15934	5540	6391	2222.05	4167	0	0
ARNTL2	MAFG	15934	5540	4981	1731.81	3639	0	0
ARNTL2	MAX	15934	5540	3125	1086.51	2055	0	0
ARNTL2	MECP2	15934	5540	7165	2491.16	4050	0	0
ARNTL2	MEF2A	15934	5540	5629	1957.11	3166	0	0
ARNTL2	MSX1	15934	5540	3665	1274.26	2699	0	0
ARNTL2	MXD1	15934	5540	3566	1239.84	2566	0	0
ARNTL2	MXD3	15934	5540	6186	2150.77	3693	0	0
ARNTL2	NFATC4	15934	5540	4877	1695.66	3087	0	0
ARNTL2	NFE2L1	15934	5540	4134	1437.33	2577	0	0
ARNTL2	NFIA	15934	5540	6056	2105.58	3418	0	0
ARNTL2	NFIC	15934	5540	6411	2229	3532	0	0
ARNTL2	NFKB2	15934	5540	7096	2467.17	4016	0	0
ARNTL2	NFYC	15934	5540	4589	1595.52	2666	0	0
ARNTL2	NR1H2	15934	5540	6180	2148.69	4395	0	0
ARNTL2	NR1H3	15934	5540	6228	2165.38	3304	0	0
ARNTL2	NR2C2	15934	5540	7461	2594.07	4445	0	0
ARNTL2	NR2F6	15934	5540	5797	2015.53	3144	0	0
ARNTL2	NR3C1	15934	5540	4372	1520.08	3232	0	0
ARNTL2	NR6A1	15934	5540	4089	1421.68	2807	0	0
ARNTL2	PARP1	15934	5540	4491	1561.45	3191	0	0
ARNTL2	PAX8	15934	5540	1388	482.59	1151	0	0
ARNTL2	POU4F3	15934	5540	1853	644.26	1726	0	0
ARNTL2	PRRX2	15934	5540	6687	2324.96	3611	0	0
ARNTL2	RBPJ	15934	5540	5590	1943.55	3419	0	0
ARNTL2	REL	15934	5540	5956	2070.81	3611	0	0
ARNTL2	RELA	15934	5540	4982	1732.16	3012	0	0
ARNTL2	RFX3	15934	5540	6203	2156.69	4473	0	0
ARNTL2	RFX7	15934	5540	5655	1966.15	3294	0	0
ARNTL2	RFXANK	15934	5540	6553	2278.37	3818	0	0
ARNTL2	SATB1	15934	5540	6040	2100.01	3516	0	0
ARNTL2	SMAD4	15934	5540	4951	1721.38	2993	0	0
ARNTL2	SMAD5	15934	5540	5433	1888.97	3297	0	0
ARNTL2	SMAD9	15934	5540	5740	1995.71	4296	0	0
ARNTL2	SOX5	15934	5540	4678	1626.47	3724	0	0
ARNTL2	SP2	15934	5540	4610	1602.82	3059	0	0
ARNTL2	SP3	15934	5540	6974	2424.75	4606	0	0
ARNTL2	SP4	15934	5540	7577	2634.4	4183	0	0
ARNTL2	STAT1	15934	5540	5027	1747.81	3025	0	0
ARNTL2	STAT2	15934	5540	2222	772.55	1649	0	0
ARNTL2	TCF12	15934	5540	5461	1898.7	3053	0	0
ARNTL2	TEAD1	15934	5540	6741	2343.74	4487	0	0
ARNTL2	TFAP2B	15934	5540	5484	1906.7	3048	0	0
ARNTL2	TFCP2	15934	5540	5711	1985.62	3659	0	0
ARNTL2	USF1	15934	5540	5916	2056.9	4097	0	0
ARNTL2	USF2	15934	5540	5429	1887.58	3159	0	0
ARNTL2	ZBTB33	15934	5540	5625	1955.72	3745	0	0
ARNTL2	ZBTB6	15934	5540	6193	2153.21	3713	0	0
ARNTL2	ZBTB7A	15934	5540	5551	1929.99	3591	0	0
ARNTL2	ZEB1	15934	5540	6373	2215.79	4323	0	0
ARNTL2	ZFX	15934	5540	5405	1879.23	3205	0	0
ARNTL2	ZNF281	15934	5540	6743	2344.43	4195	0	0
ARNTL2	ZNF354C	15934	5540	5957	2071.15	3789	0	0
ARNTL2	ZNF628	15934	5540	5135	1785.36	3122	0	0
ARNTL2	ZNF691	15934	5540	5144	1788.49	2993	0	0
ARNTL2	ZNF8	15934	5540	4508	1567.36	3020	0	0
ASCL2	CDX1	15934	3075	3646	703.62	1647	0	0
ASCL2	CEBPB	15934	3075	7021	1354.94	2356	0	0
ASCL2	CEBPD	15934	3075	7119	1373.85	2632	0	0
ASCL2	CEBPE	15934	3075	2691	519.32	1607	0	0
ASCL2	ESR1	15934	3075	5003	965.5	1908	0	0
ASCL2	ETV6	15934	3075	5446	1050.99	2292	0	0
ASCL2	FOSL1	15934	3075	5442	1050.22	2019	0	0
ASCL2	FOXC1	15934	3075	6064	1170.25	2263	0	0
ASCL2	FOXD1	15934	3075	5932	1144.78	2101	0	0
ASCL2	GATA4	15934	3075	3245	626.23	1592	0	0
ASCL2	GFI1B	15934	3075	1639	316.3	1062	0	0
ASCL2	HES1	15934	3075	5367	1035.74	2205	0	0
ASCL2	HIC1	15934	3075	5409	1043.85	2143	0	0
ASCL2	HLX	15934	3075	6419	1238.76	2355	0	0
ASCL2	IRF1	15934	3075	3168	611.37	1457	0	0
ASCL2	IRX3	15934	3075	3389	654.02	1598	0	0
ASCL2	LEF1	15934	3075	6205	1197.46	2241	0	0
ASCL2	LMO2	15934	3075	4917	948.9	2263	0	0
ASCL2	MAF	15934	3075	5117	987.5	2097	0	0
ASCL2	MAFK	15934	3075	6621	1277.74	2271	0	0
ASCL2	MEF2C	15934	3075	5675	1095.18	2101	0	0
ASCL2	MSX2	15934	3075	5128	989.62	2010	0	0
ASCL2	MYB	15934	3075	2122	409.51	1136	0	0
ASCL2	MYBL1	15934	3075	5204	1004.29	1950	0	0
ASCL2	NFATC4	15934	3075	4877	941.18	2120	0	0
ASCL2	NFE2	15934	3075	2137	412.41	1194	0	0
ASCL2	NFIA	15934	3075	6056	1168.71	2213	0	0
ASCL2	NFIB	15934	3075	6764	1305.34	2367	0	0
ASCL2	NFKB2	15934	3075	7096	1369.41	2495	0	0
ASCL2	NR1H3	15934	3075	6228	1201.9	2498	0	0
ASCL2	NR2F2	15934	3075	4641	895.64	1834	0	0
ASCL2	OSR1	15934	3075	3640	702.46	1603	0	0
ASCL2	OSR2	15934	3075	6057	1168.9	2273	0	0
ASCL2	PPARG	15934	3075	4861	938.09	1889	0	0
ASCL2	PRRX2	15934	3075	6687	1290.48	2274	0	0
ASCL2	RUNX3	15934	3075	3776	728.71	1786	0	0
ASCL2	SOX17	15934	3075	5108	985.76	2035	0	0
ASCL2	SOX18	15934	3075	6199	1196.31	2224	0	0
ASCL2	SPI1	15934	3075	5223	1007.95	2361	0	0
ASCL2	TGIF1	15934	3075	6781	1308.62	2346	0	0
ASCL2	TGIF2	15934	3075	7192	1387.94	2389	0	0
ASCL2	TP53	15934	3075	3254	627.97	1494	0	0
ASCL2	ZBTB6	15934	3075	6193	1195.15	2173	0	0
ATF1	ATF2	15934	4522	7145	2027.72	3643	0	0
ATF1	ATF4	15934	4522	5019	1424.37	2705	0	0
ATF1	ATF7	15934	4522	4952	1405.36	2532	0	0
ATF1	BBX	15934	4522	6424	1823.1	3421	0	0
ATF1	BPTF	15934	4522	7193	2041.34	3431	0	0
ATF1	BRCA1	15934	4522	4229	1200.17	2309	0	0
ATF1	CLOCK	15934	4522	7033	1995.93	3637	0	0
ATF1	CREB1	15934	4522	6109	1733.71	3057	0	0
ATF1	CTCF	15934	4522	5700	1617.64	2987	0	0
ATF1	DDIT3	15934	4522	3431	973.7	1982	0	0
ATF1	E2F4	15934	4522	3405	966.32	2207	0	0
ATF1	E4F1	15934	4522	5872	1666.45	3279	0	0
ATF1	ELF1	15934	4522	5875	1667.3	3024	0	0
ATF1	ELK3	15934	4522	6393	1814.31	3003	0	0
ATF1	ELK4	15934	4522	5091	1444.8	3169	0	0
ATF1	EP300	15934	4522	5392	1530.23	3399	0	0
ATF1	ETV3	15934	4522	6650	1887.24	3451	0	0
ATF1	FOXH1	15934	4522	4295	1218.9	2331	0	0
ATF1	FOXK1	15934	4522	3826	1085.8	2867	0	0
ATF1	FOXP1	15934	4522	3281	931.13	1897	0	0
ATF1	GABPA	15934	4522	3781	1073.03	2532	0	0
ATF1	GABPB1	15934	4522	3508	995.56	2178	0	0
ATF1	GMEB1	15934	4522	5321	1510.08	2642	0	0
ATF1	GTF2A2	15934	4522	3950	1120.99	2431	0	0
ATF1	GTF2I	15934	4522	6644	1885.54	3553	0	0
ATF1	HBP1	15934	4522	3267	927.16	1945	0	0
ATF1	HDX	15934	4522	6872	1950.24	3183	0	0
ATF1	HIF1A	15934	4522	5951	1688.87	2959	0	0
ATF1	HLTF	15934	4522	5234	1485.39	3391	0	0
ATF1	HMBOX1	15934	4522	5057	1435.15	2858	0	0
ATF1	HOXA6	15934	4522	3797	1077.57	2304	0	0
ATF1	HSF1	15934	4522	4003	1136.03	2251	0	0
ATF1	IRF7	15934	4522	4515	1281.34	2634	0	0
ATF1	JUND	15934	4522	5169	1466.94	2863	0	0
ATF1	KLF7	15934	4522	6391	1813.74	3154	0	0
ATF1	LHX4	15934	4522	2906	824.71	1980	0	0
ATF1	MAX	15934	4522	3125	886.86	2032	0	0
ATF1	MAZ	15934	4522	5582	1584.15	2953	0	0
ATF1	MEF2A	15934	4522	5629	1597.49	3352	0	0
ATF1	MSX1	15934	4522	3665	1040.11	2048	0	0
ATF1	MTF1	15934	4522	5479	1554.92	2750	0	0
ATF1	MXD3	15934	4522	6186	1755.56	3269	0	0
ATF1	NFATC2	15934	4522	6108	1733.42	2869	0	0
ATF1	NFE2L2	15934	4522	4690	1331	2639	0	0
ATF1	NFIC	15934	4522	6411	1819.41	3536	0	0
ATF1	NFYA	15934	4522	3739	1061.11	2380	0	0
ATF1	NR1H2	15934	4522	6180	1753.86	2938	0	0
ATF1	NR1I3	15934	4522	4079	1157.6	2465	0	0
ATF1	NR2C2	15934	4522	7461	2117.4	3486	0	0
ATF1	NR2E3	15934	4522	3809	1080.98	2141	0	0
ATF1	NR2F6	15934	4522	5797	1645.16	3382	0	0
ATF1	PBX1	15934	4522	3918	1111.91	2911	0	0
ATF1	POU2F1	15934	4522	4726	1341.22	2643	0	0
ATF1	PPARA	15934	4522	3768	1069.34	2155	0	0
ATF1	RBPJ	15934	4522	5590	1586.42	3030	0	0
ATF1	REL	15934	4522	5956	1690.29	3297	0	0
ATF1	REST	15934	4522	6798	1929.24	3311	0	0
ATF1	RFX3	15934	4522	6203	1760.38	3138	0	0
ATF1	RFX7	15934	4522	5655	1604.86	2886	0	0
ATF1	RFXANK	15934	4522	6553	1859.71	3481	0	0
ATF1	RORA	15934	4522	4211	1195.06	2691	0	0
ATF1	RREB1	15934	4522	5786	1642.04	3780	0	0
ATF1	SMAD4	15934	4522	4951	1405.07	2586	0	0
ATF1	SMAD5	15934	4522	5433	1541.86	3304	0	0
ATF1	SMAD9	15934	4522	5740	1628.99	2948	0	0
ATF1	SOX5	15934	4522	4678	1327.6	2455	0	0
ATF1	SP2	15934	4522	4610	1308.3	2780	0	0
ATF1	SP3	15934	4522	6974	1979.19	3245	0	0
ATF1	SP4	15934	4522	7577	2150.32	3258	0	0
ATF1	SPDEF	15934	4522	2108	598.24	1398	0	0
ATF1	TCF12	15934	4522	5461	1549.81	3316	0	0
ATF1	TEAD1	15934	4522	6741	1913.07	3006	0	0
ATF1	TFCP2	15934	4522	5711	1620.76	3031	0	0
ATF1	TFEB	15934	4522	4597	1304.61	2734	0	0
ATF1	USF1	15934	4522	5916	1678.94	3011	0	0
ATF1	USF2	15934	4522	5429	1540.73	3060	0	0
ATF1	YY1	15934	4522	4314	1224.29	3105	0	0
ATF1	ZBTB16	15934	4522	2489	706.37	1551	0	0
ATF1	ZBTB33	15934	4522	5625	1596.35	2847	0	0
ATF1	ZFX	15934	4522	5405	1533.92	3595	0	0
ATF1	ZNF143	15934	4522	3633	1031.03	2762	0	0
ATF1	ZNF148	15934	4522	3236	918.36	2332	0	0
ATF1	ZNF281	15934	4522	6743	1913.63	3635	0	0
ATF1	ZNF354C	15934	4522	5957	1690.57	3435	0	0
ATF1	ZNF628	15934	4522	5135	1457.29	2677	0	0
ATF2	ATF4	15934	7145	5019	2250.58	4309	0	0
ATF2	ATF5	15934	7145	3064	1373.93	2405	0	0
ATF2	ATF7	15934	7145	4952	2220.54	3655	0	0
ATF2	BBX	15934	7145	6424	2880.6	5047	0	0
ATF2	BPTF	15934	7145	7193	3225.43	5741	0	0
ATF2	BRCA1	15934	7145	4229	1896.34	3677	0	0
ATF2	CDC5L	15934	7145	3952	1772.13	2935	0	0
ATF2	CEBPB	15934	7145	7021	3148.3	4352	0	0
ATF2	CLOCK	15934	7145	7033	3153.68	6552	0	0
ATF2	CREB1	15934	7145	6109	2739.35	4972	0	0
ATF2	CTCF	15934	7145	5700	2555.95	4711	0	0
ATF2	DDIT3	15934	7145	3431	1538.5	2550	0	0
ATF2	E4F1	15934	7145	5872	2633.08	4835	0	0
ATF2	ELF1	15934	7145	5875	2634.42	4003	0	0
ATF2	ELK3	15934	7145	6393	2866.7	4701	0	0
ATF2	ELK4	15934	7145	5091	2282.87	4399	0	0
ATF2	EP300	15934	7145	5392	2417.84	4774	0	0
ATF2	ESRRA	15934	7145	3587	1608.45	2736	0	0
ATF2	ETV3	15934	7145	6650	2981.94	6070	0	0
ATF2	EWSR1	15934	7145	4241	1901.72	3142	0	0
ATF2	FOXK1	15934	7145	3826	1715.63	3441	0	0
ATF2	FOXP1	15934	7145	3281	1471.24	2627	0	0
ATF2	GABPA	15934	7145	3781	1695.45	3055	0	0
ATF2	GMEB1	15934	7145	5321	2386	3707	0	0
ATF2	GTF2A2	15934	7145	3950	1771.23	3052	0	0
ATF2	GTF2I	15934	7145	6644	2979.25	6226	0	0
ATF2	HDX	15934	7145	6872	3081.49	5912	0	0
ATF2	HLTF	15934	7145	5234	2346.99	4175	0	0
ATF2	HMBOX1	15934	7145	5057	2267.62	4110	0	0
ATF2	HOXA6	15934	7145	3797	1702.62	3341	0	0
ATF2	HSF1	15934	7145	4003	1794.99	2841	0	0
ATF2	IKZF2	15934	7145	3158	1416.09	2378	0	0
ATF2	IRF3	15934	7145	6529	2927.68	5395	0	0
ATF2	IRF6	15934	7145	3660	1641.19	2668	0	0
ATF2	IRF7	15934	7145	4515	2024.58	3310	0	0
ATF2	JUND	15934	7145	5169	2317.84	4237	0	0
ATF2	KLF12	15934	7145	4247	1904.41	3412	0	0
ATF2	KLF7	15934	7145	6391	2865.8	5753	0	0
ATF2	MAFG	15934	7145	4981	2233.54	4068	0	0
ATF2	MAX	15934	7145	3125	1401.29	2816	0	0
ATF2	MAZ	15934	7145	5582	2503.04	4126	0	0
ATF2	MECP2	15934	7145	7165	3212.87	4539	0	0
ATF2	MEF2A	15934	7145	5629	2524.11	4628	0	0
ATF2	MSX1	15934	7145	3665	1643.43	3306	0	0
ATF2	MXD1	15934	7145	3566	1599.04	2680	0	0
ATF2	MXD3	15934	7145	6186	2773.88	5337	0	0
ATF2	NFATC2	15934	7145	6108	2738.9	4228	0	0
ATF2	NFE2L1	15934	7145	4134	1853.74	3113	0	0
ATF2	NFE2L2	15934	7145	4690	2103.05	3770	0	0
ATF2	NFIC	15934	7145	6411	2874.77	5499	0	0
ATF2	NFKB2	15934	7145	7096	3181.93	4452	0	0
ATF2	NFYA	15934	7145	3739	1676.61	3112	0	0
ATF2	NR1H2	15934	7145	6180	2771.19	5008	0	0
ATF2	NR2C2	15934	7145	7461	3345.6	5960	0	0
ATF2	NR2E3	15934	7145	3809	1708	3062	0	0
ATF2	NR2F6	15934	7145	5797	2599.45	4800	0	0
ATF2	NR3C1	15934	7145	4372	1960.46	3224	0	0
ATF2	NR6A1	15934	7145	4089	1833.56	3211	0	0
ATF2	PARP1	15934	7145	4491	2013.82	3624	0	0
ATF2	PBX1	15934	7145	3918	1756.88	2846	0	0
ATF2	POU2F1	15934	7145	4726	2119.2	3647	0	0
ATF2	POU4F3	15934	7145	1853	830.91	1758	0	0
ATF2	RBPJ	15934	7145	5590	2506.62	5041	0	0
ATF2	REL	15934	7145	5956	2670.74	5330	0	0
ATF2	REST	15934	7145	6798	3048.31	4287	0	0
ATF2	RFX3	15934	7145	6203	2781.5	5571	0	0
ATF2	RFX5	15934	7145	6898	3093.15	4285	0	0
ATF2	RFX7	15934	7145	5655	2535.77	4248	0	0
ATF2	RFXANK	15934	7145	6553	2938.45	5927	0	0
ATF2	RREB1	15934	7145	5786	2594.51	4610	0	0
ATF2	SATB1	15934	7145	6040	2708.41	4546	0	0
ATF2	SMAD2	15934	7145	4122	1848.36	3087	0	0
ATF2	SMAD4	15934	7145	4951	2220.09	3688	0	0
ATF2	SMAD5	15934	7145	5433	2436.22	4429	0	0
ATF2	SMAD9	15934	7145	5740	2573.89	5098	0	0
ATF2	SOX18	15934	7145	6199	2779.71	4023	0	0
ATF2	SOX5	15934	7145	4678	2097.67	3965	0	0
ATF2	SP2	15934	7145	4610	2067.18	4062	0	0
ATF2	SP3	15934	7145	6974	3127.23	5573	0	0
ATF2	SP4	15934	7145	7577	3397.62	5284	0	0
ATF2	STAT1	15934	7145	5027	2254.17	3697	0	0
ATF2	STAT2	15934	7145	2222	996.37	1829	0	0
ATF2	TCF12	15934	7145	5461	2448.78	4489	0	0
ATF2	TEAD1	15934	7145	6741	3022.75	4993	0	0
ATF2	TFCP2	15934	7145	5711	2560.88	4633	0	0
ATF2	TRIM28	15934	7145	5990	2685.99	4318	0	0
ATF2	USF1	15934	7145	5916	2652.81	5189	0	0
ATF2	USF2	15934	7145	5429	2434.43	4680	0	0
ATF2	YY1	15934	7145	4314	1934.45	3473	0	0
ATF2	ZBTB33	15934	7145	5625	2522.32	4814	0	0
ATF2	ZBTB6	15934	7145	6193	2777.02	4299	0	0
ATF2	ZBTB7A	15934	7145	5551	2489.14	3758	0	0
ATF2	ZEB1	15934	7145	6373	2857.73	4436	0	0
ATF2	ZFX	15934	7145	5405	2423.67	4779	0	0
ATF2	ZNF143	15934	7145	3633	1629.08	2886	0	0
ATF2	ZNF281	15934	7145	6743	3023.64	6284	0	0
ATF2	ZNF354C	15934	7145	5957	2671.19	5201	0	0
ATF2	ZNF628	15934	7145	5135	2302.6	4348	0	0
ATF2	ZNF691	15934	7145	5144	2306.63	3713	0	0
ATF3	BCL6	15934	3263	2911	596.12	1679	0	0
ATF3	BCL6B	15934	3263	5362	1098.04	2458	0	0
ATF3	BHLHE40	15934	3263	3095	633.8	2192	0	0
ATF3	CEBPD	15934	3263	7119	1457.84	2654	0	0
ATF3	CEBPE	15934	3263	2691	551.07	1477	0	0
ATF3	CREM	15934	3263	4692	960.84	2054	0	0
ATF3	EGR3	15934	3263	2485	508.88	1691	0	0
ATF3	ERG	15934	3263	5359	1097.43	2180	0	0
ATF3	ESR1	15934	3263	5003	1024.53	2108	0	0
ATF3	ETS1	15934	3263	5459	1117.91	2149	0	0
ATF3	ETS2	15934	3263	3500	716.74	1910	0	0
ATF3	ETV6	15934	3263	5446	1115.24	2153	0	0
ATF3	FLI1	15934	3263	5096	1043.57	2091	0	0
ATF3	FOS	15934	3263	941	192.7	795	0	0
ATF3	FOSB	15934	3263	1597	327.04	1460	0	0
ATF3	FOSL1	15934	3263	5442	1114.42	2816	0	0
ATF3	FOSL2	15934	3263	4280	876.47	2138	0	0
ATF3	FOXC1	15934	3263	6064	1241.8	2828	0	0
ATF3	FOXD1	15934	3263	5932	1214.77	2175	0	0
ATF3	FOXF2	15934	3263	3774	772.85	1668	0	0
ATF3	FOXO1	15934	3263	5880	1204.12	2354	0	0
ATF3	GATA6	15934	3263	5780	1183.64	2177	0	0
ATF3	GFI1B	15934	3263	1639	335.64	1175	0	0
ATF3	GLIS3	15934	3263	4828	988.69	1979	0	0
ATF3	HES1	15934	3263	5367	1099.07	2353	0	0
ATF3	HIC1	15934	3263	5409	1107.67	2587	0	0
ATF3	IRF1	15934	3263	3168	648.75	1976	0	0
ATF3	IRF4	15934	3263	3034	621.31	1716	0	0
ATF3	IRF8	15934	3263	3317	679.26	1632	0	0
ATF3	JDP2	15934	3263	3355	687.04	1928	0	0
ATF3	JUN	15934	3263	2019	413.46	1395	0	0
ATF3	KLF4	15934	3263	4672	956.74	2380	0	0
ATF3	MAF	15934	3263	5117	1047.87	2198	0	0
ATF3	MAFB	15934	3263	3852	788.82	1813	0	0
ATF3	MAFF	15934	3263	4785	979.88	3017	0	0
ATF3	MAFK	15934	3263	6621	1355.86	2848	0	0
ATF3	MEF2C	15934	3263	5675	1162.14	2249	0	0
ATF3	MSX2	15934	3263	5128	1050.12	2107	0	0
ATF3	MYC	15934	3263	5658	1158.66	2789	0	0
ATF3	NFATC1	15934	3263	6432	1317.16	2730	0	0
ATF3	NFE2	15934	3263	2137	437.62	1390	0	0
ATF3	NFIB	15934	3263	6764	1385.15	2362	0	0
ATF3	NFIL3	15934	3263	5966	1221.73	2989	0	0
ATF3	NFKB2	15934	3263	7096	1453.13	2468	0	0
ATF3	NR4A1	15934	3263	2232	457.07	1610	0	0
ATF3	NR5A2	15934	3263	4050	829.37	1794	0	0
ATF3	OSR2	15934	3263	6057	1240.37	2211	0	0
ATF3	POU2AF1	15934	3263	2412	493.93	1294	0	0
ATF3	PPARG	15934	3263	4861	995.45	2111	0	0
ATF3	PRDM1	15934	3263	4678	957.97	2276	0	0
ATF3	PRRX1	15934	3263	5303	1085.96	2264	0	0
ATF3	RUNX3	15934	3263	3776	773.26	2201	0	0
ATF3	SOX17	15934	3263	5108	1046.03	2501	0	0
ATF3	SPI1	15934	3263	5223	1069.58	2149	0	0
ATF3	SPIB	15934	3263	2011	411.82	1203	0	0
ATF3	SRF	15934	3263	2392	489.84	1313	0	0
ATF3	STAT3	15934	3263	3635	744.38	1751	0	0
ATF3	TAL1	15934	3263	5037	1031.49	2110	0	0
ATF3	TBX18	15934	3263	4713	965.14	2072	0	0
ATF3	TGIF1	15934	3263	6781	1388.63	2906	0	0
ATF3	TGIF2	15934	3263	7192	1472.79	2605	0	0
ATF3	WT1	15934	3263	2257	462.19	1339	0	0
ATF3	ZBTB3	15934	3263	3329	681.72	1981	0	0
ATF3	ZBTB6	15934	3263	6193	1268.22	2292	0	0
ATF4	ATF5	15934	5019	3064	965.12	2301	0	0
ATF4	ATF7	15934	5019	4952	1559.81	2815	0	0
ATF4	BBX	15934	5019	6424	2023.48	3488	0	0
ATF4	BPTF	15934	5019	7193	2265.7	4412	0	0
ATF4	BRCA1	15934	5019	4229	1332.08	3025	0	0
ATF4	CDC5L	15934	5019	3952	1244.83	2289	0	0
ATF4	CEBPB	15934	5019	7021	2211.52	3807	0	0
ATF4	CEBPD	15934	5019	7119	2242.39	3365	0	0
ATF4	CLOCK	15934	5019	7033	2215.3	4229	0	0
ATF4	CREB1	15934	5019	6109	1924.25	3809	0	0
ATF4	CTCF	15934	5019	5700	1795.42	3848	0	0
ATF4	E4F1	15934	5019	5872	1849.6	3667	0	0
ATF4	ELK3	15934	5019	6393	2013.71	3471	0	0
ATF4	ELK4	15934	5019	5091	1603.6	3141	0	0
ATF4	EP300	15934	5019	5392	1698.41	3296	0	0
ATF4	ESRRA	15934	5019	3587	1129.86	2354	0	0
ATF4	ETV3	15934	5019	6650	2094.66	3991	0	0
ATF4	EWSR1	15934	5019	4241	1335.86	2754	0	0
ATF4	FOXK1	15934	5019	3826	1205.14	2675	0	0
ATF4	GABPA	15934	5019	3781	1190.97	2524	0	0
ATF4	GTF2I	15934	5019	6644	2092.77	4229	0	0
ATF4	HDX	15934	5019	6872	2164.59	4339	0	0
ATF4	HLTF	15934	5019	5234	1648.64	3040	0	0
ATF4	HMBOX1	15934	5019	5057	1592.89	2822	0	0
ATF4	HOXA6	15934	5019	3797	1196	2530	0	0
ATF4	HSF1	15934	5019	4003	1260.89	2478	0	0
ATF4	IKZF2	15934	5019	3158	994.73	2094	0	0
ATF4	IRF3	15934	5019	6529	2056.55	3989	0	0
ATF4	IRF7	15934	5019	4515	1422.17	2512	0	0
ATF4	JUND	15934	5019	5169	1628.17	3981	0	0
ATF4	KLF12	15934	5019	4247	1337.75	2894	0	0
ATF4	KLF7	15934	5019	6391	2013.08	4019	0	0
ATF4	LHX4	15934	5019	2906	915.35	1859	0	0
ATF4	MAFG	15934	5019	4981	1568.95	3237	0	0
ATF4	MAX	15934	5019	3125	984.33	2222	0	0
ATF4	MAZ	15934	5019	5582	1758.26	2997	0	0
ATF4	MECP2	15934	5019	7165	2256.88	3475	0	0
ATF4	MEF2A	15934	5019	5629	1773.06	3295	0	0
ATF4	MSX1	15934	5019	3665	1154.43	2908	0	0
ATF4	MXD3	15934	5019	6186	1948.51	3914	0	0
ATF4	NFATC2	15934	5019	6108	1923.94	3026	0	0
ATF4	NFE2L1	15934	5019	4134	1302.16	2707	0	0
ATF4	NFIC	15934	5019	6411	2019.38	3727	0	0
ATF4	NFKB2	15934	5019	7096	2235.15	3778	0	0
ATF4	NR1H2	15934	5019	6180	1946.62	4375	0	0
ATF4	NR2C2	15934	5019	7461	2350.12	4125	0	0
ATF4	NR2E3	15934	5019	3809	1199.78	2424	0	0
ATF4	NR2F6	15934	5019	5797	1825.98	3316	0	0
ATF4	NR3C1	15934	5019	4372	1377.12	2499	0	0
ATF4	NR6A1	15934	5019	4089	1287.98	2650	0	0
ATF4	PARP1	15934	5019	4491	1414.61	3416	0	0
ATF4	PBX1	15934	5019	3918	1234.12	2249	0	0
ATF4	POU2F1	15934	5019	4726	1488.63	2876	0	0
ATF4	POU4F3	15934	5019	1853	583.67	1492	0	0
ATF4	RBPJ	15934	5019	5590	1760.78	3508	0	0
ATF4	REL	15934	5019	5956	1876.06	3538	0	0
ATF4	RELA	15934	5019	4982	1569.26	2670	0	0
ATF4	RFX3	15934	5019	6203	1953.86	3895	0	0
ATF4	RFX7	15934	5019	5655	1781.25	3514	0	0
ATF4	RFXANK	15934	5019	6553	2064.11	3719	0	0
ATF4	RREB1	15934	5019	5786	1822.51	3173	0	0
ATF4	SATB1	15934	5019	6040	1902.52	3170	0	0
ATF4	SMAD4	15934	5019	4951	1559.5	3106	0	0
ATF4	SMAD5	15934	5019	5433	1711.32	3291	0	0
ATF4	SMAD9	15934	5019	5740	1808.02	3926	0	0
ATF4	SOX5	15934	5019	4678	1473.51	3262	0	0
ATF4	SP2	15934	5019	4610	1452.09	3319	0	0
ATF4	SP3	15934	5019	6974	2196.72	4011	0	0
ATF4	SP4	15934	5019	7577	2386.66	3904	0	0
ATF4	STAT1	15934	5019	5027	1583.44	3019	0	0
ATF4	STAT2	15934	5019	2222	699.9	1618	0	0
ATF4	TCF12	15934	5019	5461	1720.14	3154	0	0
ATF4	TEAD1	15934	5019	6741	2123.33	3746	0	0
ATF4	TFCP2	15934	5019	5711	1798.89	3906	0	0
ATF4	TRIM28	15934	5019	5990	1886.77	3056	0	0
ATF4	USF1	15934	5019	5916	1863.46	3543	0	0
ATF4	USF2	15934	5019	5429	1710.06	3417	0	0
ATF4	ZBTB33	15934	5019	5625	1771.8	3756	0	0
ATF4	ZBTB6	15934	5019	6193	1950.71	3626	0	0
ATF4	ZBTB7A	15934	5019	5551	1748.49	3007	0	0
ATF4	ZEB1	15934	5019	6373	2007.41	3438	0	0
ATF4	ZFX	15934	5019	5405	1702.5	3402	0	0
ATF4	ZNF143	15934	5019	3633	1144.35	2318	0	0
ATF4	ZNF281	15934	5019	6743	2123.96	4189	0	0
ATF4	ZNF354C	15934	5019	5957	1876.38	3984	0	0
ATF4	ZNF628	15934	5019	5135	1617.46	3080	0	0
ATF4	ZNF8	15934	5019	4508	1419.96	2472	0	0
ATF5	ATF7	15934	3064	4952	952.24	2321	0	0
ATF5	BPTF	15934	3064	7193	1383.17	2460	0	0
ATF5	BRCA1	15934	3064	4229	813.21	1836	0	0
ATF5	CEBPB	15934	3064	7021	1350.09	2387	0	0
ATF5	CLOCK	15934	3064	7033	1352.4	2316	0	0
ATF5	CREB1	15934	3064	6109	1174.72	2531	0	0
ATF5	CTCF	15934	3064	5700	1096.07	2232	0	0
ATF5	E4F1	15934	3064	5872	1129.15	2133	0	0
ATF5	ELK3	15934	3064	6393	1229.33	2388	0	0
ATF5	ELK4	15934	3064	5091	978.96	1974	0	0
ATF5	EP300	15934	3064	5392	1036.84	2031	0	0
ATF5	ESRRA	15934	3064	3587	689.76	1676	0	0
ATF5	ETV3	15934	3064	6650	1278.75	2324	0	0
ATF5	EWSR1	15934	3064	4241	815.52	1724	0	0
ATF5	FOXO3	15934	3064	3554	683.41	1587	0	0
ATF5	GABPA	15934	3064	3781	727.06	1796	0	0
ATF5	GTF2I	15934	3064	6644	1277.6	2329	0	0
ATF5	HDX	15934	3064	6872	1321.44	2355	0	0
ATF5	IRF3	15934	3064	6529	1255.48	2330	0	0
ATF5	JUND	15934	3064	5169	993.96	2070	0	0
ATF5	KLF12	15934	3064	4247	816.67	1999	0	0
ATF5	KLF7	15934	3064	6391	1228.95	2422	0	0
ATF5	MAFG	15934	3064	4981	957.81	2016	0	0
ATF5	MEF2A	15934	3064	5629	1082.42	2163	0	0
ATF5	MSX1	15934	3064	3665	704.75	1774	0	0
ATF5	MXD1	15934	3064	3566	685.72	1565	0	0
ATF5	MXD3	15934	3064	6186	1189.53	2215	0	0
ATF5	NR1H2	15934	3064	6180	1188.37	2451	0	0
ATF5	NR2C2	15934	3064	7461	1434.7	2397	0	0
ATF5	NR3C1	15934	3064	4372	840.71	2098	0	0
ATF5	PARP1	15934	3064	4491	863.59	2027	0	0
ATF5	POU4F3	15934	3064	1853	356.32	1123	0	0
ATF5	REL	15934	3064	5956	1145.3	2165	0	0
ATF5	RFX3	15934	3064	6203	1192.79	2518	0	0
ATF5	SMAD9	15934	3064	5740	1103.76	2347	0	0
ATF5	SOX5	15934	3064	4678	899.55	2445	0	0
ATF5	SP2	15934	3064	4610	886.47	1884	0	0
ATF5	SP3	15934	3064	6974	1341.05	2549	0	0
ATF5	TCF12	15934	3064	5461	1050.11	2036	0	0
ATF5	TEAD1	15934	3064	6741	1296.25	2451	0	0
ATF5	TFCP2	15934	3064	5711	1098.19	2133	0	0
ATF5	TFDP1	15934	3064	3905	750.9	1724	0	0
ATF5	USF1	15934	3064	5916	1137.61	2208	0	0
ATF5	USF2	15934	3064	5429	1043.96	2029	0	0
ATF5	ZBTB33	15934	3064	5625	1081.65	2126	0	0
ATF5	ZBTB7A	15934	3064	5551	1067.42	2008	0	0
ATF5	ZEB1	15934	3064	6373	1225.48	2620	0	0
ATF5	ZFX	15934	3064	5405	1039.34	2007	0	0
ATF5	ZNF281	15934	3064	6743	1296.63	2424	0	0
ATF5	ZNF354C	15934	3064	5957	1145.49	2296	0	0
ATF5	ZNF628	15934	3064	5135	987.43	1950	0	0
ATF5	ZNF8	15934	3064	4508	866.86	1813	0	0
ATF7	BPTF	15934	4952	7193	2235.45	3673	0	0
ATF7	BRCA1	15934	4952	4229	1314.3	2580	0	0
ATF7	CLOCK	15934	4952	7033	2185.73	3545	0	0
ATF7	CREB1	15934	4952	6109	1898.57	3863	0	0
ATF7	CTCF	15934	4952	5700	1771.46	3442	0	0
ATF7	DDIT3	15934	4952	3431	1066.29	2120	0	0
ATF7	E2F5	15934	4952	3950	1227.59	2341	0	0
ATF7	E4F1	15934	4952	5872	1824.91	3142	0	0
ATF7	EBF2	15934	4952	4718	1466.27	2967	0	0
ATF7	ELF1	15934	4952	5875	1825.84	3071	0	0
ATF7	ELK3	15934	4952	6393	1986.83	3721	0	0
ATF7	ELK4	15934	4952	5091	1582.19	3046	0	0
ATF7	EP300	15934	4952	5392	1675.74	3559	0	0
ATF7	ETV3	15934	4952	6650	2066.7	3537	0	0
ATF7	FOXJ3	15934	4952	4035	1254.01	2314	0	0
ATF7	FOXK1	15934	4952	3826	1189.05	2426	0	0
ATF7	FOXO3	15934	4952	3554	1104.52	2537	0	0
ATF7	GABPA	15934	4952	3781	1175.07	2820	0	0
ATF7	GABPB1	15934	4952	3508	1090.22	2164	0	0
ATF7	GMEB1	15934	4952	5321	1653.67	3168	0	0
ATF7	GTF2A2	15934	4952	3950	1227.59	2476	0	0
ATF7	GTF2I	15934	4952	6644	2064.84	3570	0	0
ATF7	HDX	15934	4952	6872	2135.69	3284	0	0
ATF7	HSF1	15934	4952	4003	1244.06	2456	0	0
ATF7	JUND	15934	4952	5169	1606.43	3109	0	0
ATF7	KLF12	15934	4952	4247	1319.89	2598	0	0
ATF7	KLF7	15934	4952	6391	1986.21	3433	0	0
ATF7	LHX4	15934	4952	2906	903.13	1945	0	0
ATF7	MAFG	15934	4952	4981	1548.01	2628	0	0
ATF7	MEF2A	15934	4952	5629	1749.39	3633	0	0
ATF7	MXD1	15934	4952	3566	1108.25	2164	0	0
ATF7	MXD3	15934	4952	6186	1922.5	3263	0	0
ATF7	NFATC2	15934	4952	6108	1898.26	3294	0	0
ATF7	NFYA	15934	4952	3739	1162.01	2343	0	0
ATF7	NR1H2	15934	4952	6180	1920.63	3083	0	0
ATF7	NR2C2	15934	4952	7461	2318.74	3578	0	0
ATF7	NR2E3	15934	4952	3809	1183.77	2247	0	0
ATF7	NR3C1	15934	4952	4372	1358.74	2663	0	0
ATF7	PARP1	15934	4952	4491	1395.72	2620	0	0
ATF7	POU2F1	15934	4952	4726	1468.76	2544	0	0
ATF7	POU4F3	15934	4952	1853	575.88	1483	0	0
ATF7	REL	15934	4952	5956	1851.02	3267	0	0
ATF7	REST	15934	4952	6798	2112.7	3329	0	0
ATF7	RFX3	15934	4952	6203	1927.78	3800	0	0
ATF7	RFX7	15934	4952	5655	1757.47	2888	0	0
ATF7	RFXANK	15934	4952	6553	2036.55	3231	0	0
ATF7	RREB1	15934	4952	5786	1798.18	2974	0	0
ATF7	SMAD1	15934	4952	3377	1049.51	2314	0	0
ATF7	SMAD4	15934	4952	4951	1538.68	2702	0	0
ATF7	SMAD5	15934	4952	5433	1688.48	3130	0	0
ATF7	SMAD9	15934	4952	5740	1783.89	3483	0	0
ATF7	SOX5	15934	4952	4678	1453.84	3267	0	0
ATF7	SP2	15934	4952	4610	1432.7	2900	0	0
ATF7	SP3	15934	4952	6974	2167.39	3767	0	0
ATF7	TCF12	15934	4952	5461	1697.18	3568	0	0
ATF7	TEAD1	15934	4952	6741	2094.98	3539	0	0
ATF7	TFCP2	15934	4952	5711	1774.88	3427	0	0
ATF7	TFDP1	15934	4952	3905	1213.6	2864	0	0
ATF7	USF1	15934	4952	5916	1838.59	3254	0	0
ATF7	USF2	15934	4952	5429	1687.24	2965	0	0
ATF7	ZEB1	15934	4952	6373	1980.61	3388	0	0
ATF7	ZFX	15934	4952	5405	1679.78	3430	0	0
ATF7	ZNF143	15934	4952	3633	1129.07	2311	0	0
ATF7	ZNF281	15934	4952	6743	2095.6	3829	0	0
ATF7	ZNF354C	15934	4952	5957	1851.33	3738	0	0
ATF7	ZNF8	15934	4952	4508	1401.01	2680	0	0
BACH1	BCL6	15934	5128	2911	936.84	2093	0	0
BACH1	BHLHE40	15934	5128	3095	996.06	1982	0	0
BACH1	DBP	15934	5128	3377	1086.81	2077	0	0
BACH1	EBF2	15934	5128	4718	1518.38	2723	0	0
BACH1	ELF1	15934	5128	5875	1890.74	3305	0	0
BACH1	ERG	15934	5128	5359	1724.67	2828	0	0
BACH1	ETS1	15934	5128	5459	1756.86	3446	0	0
BACH1	ETS2	15934	5128	3500	1126.4	2113	0	0
BACH1	FOXO1	15934	5128	5880	1892.35	3310	0	0
BACH1	GABPB1	15934	5128	3508	1128.97	2435	0	0
BACH1	GLI3	15934	5128	5828	1875.61	3219	0	0
BACH1	GLIS3	15934	5128	4828	1553.78	3157	0	0
BACH1	GMEB1	15934	5128	5321	1712.44	2856	0	0
BACH1	HIF1A	15934	5128	5951	1915.2	3382	0	0
BACH1	KLF11	15934	5128	4286	1379.35	2645	0	0
BACH1	KLF4	15934	5128	4672	1503.58	2763	0	0
BACH1	MAFB	15934	5128	3852	1239.68	2456	0	0
BACH1	MITF	15934	5128	3542	1139.91	2241	0	0
BACH1	MYC	15934	5128	5658	1820.9	3219	0	0
BACH1	MZF1	15934	5128	5247	1688.63	2912	0	0
BACH1	NFATC2	15934	5128	6108	1965.72	3252	0	0
BACH1	NFIL3	15934	5128	5966	1920.02	3108	0	0
BACH1	NFKB1	15934	5128	6135	1974.41	3758	0	0
BACH1	NR2F2	15934	5128	4641	1493.6	2554	0	0
BACH1	NR5A2	15934	5128	4050	1303.4	2342	0	0
BACH1	PGR	15934	5128	5476	1762.33	3144	0	0
BACH1	PRDM1	15934	5128	4678	1505.51	2743	0	0
BACH1	REST	15934	5128	6798	2187.78	3780	0	0
BACH1	SOX13	15934	5128	4789	1541.23	2731	0	0
BACH1	SOX6	15934	5128	1864	599.89	1403	0	0
BACH1	STAT3	15934	5128	3635	1169.84	2779	0	0
BACH1	TBX18	15934	5128	4713	1516.77	2892	0	0
BACH1	TP63	15934	5128	1888	607.61	1421	0	0
BACH1	WT1	15934	5128	2257	726.36	1633	0	0
BARX1	BCL6B	15934	2635	5362	886.71	1923	0	0
BARX1	CDX1	15934	2635	3646	602.94	1924	0	0
BARX1	DLX5	15934	2635	4589	758.88	1881	0	0
BARX1	DMRT3	15934	2635	1712	283.11	1067	0	0
BARX1	FLI1	15934	2635	5096	842.72	1767	0	0
BARX1	FOXD1	15934	2635	5932	980.97	1871	0	0
BARX1	FOXF1	15934	2635	3203	529.68	1377	0	0
BARX1	FOXF2	15934	2635	3774	624.11	1723	0	0
BARX1	FOXL1	15934	2635	5470	904.57	1960	0	0
BARX1	GATA1	15934	2635	1505	248.88	953	0	0
BARX1	GSC	15934	2635	2293	379.19	1156	0	0
BARX1	HES1	15934	2635	5367	887.54	1787	0	0
BARX1	HIC1	15934	2635	5409	894.48	2004	0	0
BARX1	HLX	15934	2635	6419	1061.51	2376	0	0
BARX1	HOXD9	15934	2635	4526	748.46	1837	0	0
BARX1	IRF6	15934	2635	3660	605.25	1492	0	0
BARX1	IRX2	15934	2635	1752	289.73	1186	0	0
BARX1	JDP2	15934	2635	3355	554.82	1420	0	0
BARX1	LMO2	15934	2635	4917	813.12	2175	0	0
BARX1	NFATC4	15934	2635	4877	806.51	1754	0	0
BARX1	NFKB2	15934	2635	7096	1173.46	2117	0	0
BARX1	PPARG	15934	2635	4861	803.86	1992	0	0
BARX1	PRRX2	15934	2635	6687	1105.83	2085	0	0
BARX1	RELA	15934	2635	4982	823.87	1771	0	0
BARX1	RFX5	15934	2635	6898	1140.72	2152	0	0
BARX1	SOX11	15934	2635	4130	682.98	1649	0	0
BARX1	SOX17	15934	2635	5108	844.71	1922	0	0
BARX1	SOX18	15934	2635	6199	1025.13	2259	0	0
BARX1	SOX21	15934	2635	2310	382	1193	0	0
BARX1	SOX8	15934	2635	4248	702.49	1549	0	0
BARX1	TAL1	15934	2635	5037	832.97	1976	0	0
BARX1	TBX15	15934	2635	4029	666.27	1622	0	0
BARX1	TCF3	15934	2635	4881	807.17	1769	0	0
BARX1	TP53	15934	2635	3254	538.11	1339	0	0
BBX	BPTF	15934	6424	7193	2899.95	4652	0	0
BBX	BRCA1	15934	6424	4229	1704.98	3335	0	0
BBX	CDC5L	15934	6424	3952	1593.3	2958	0	0
BBX	CLOCK	15934	6424	7033	2835.45	5115	0	0
BBX	CREB1	15934	6424	6109	2462.92	3986	0	0
BBX	CTCF	15934	6424	5700	2298.03	3899	0	0
BBX	E4F1	15934	6424	5872	2367.37	3994	0	0
BBX	ELK4	15934	6424	5091	2052.5	3620	0	0
BBX	EP300	15934	6424	5392	2173.86	3765	0	0
BBX	ETV3	15934	6424	6650	2681.03	4627	0	0
BBX	FOXK1	15934	6424	3826	1542.5	2919	0	0
BBX	FOXP1	15934	6424	3281	1322.78	2456	0	0
BBX	GABPA	15934	6424	3781	1524.36	2637	0	0
BBX	GABPB2	15934	6424	2995	1207.47	2277	0	0
BBX	GTF2I	15934	6424	6644	2678.62	4704	0	0
BBX	HDX	15934	6424	6872	2770.54	4791	0	0
BBX	HLTF	15934	6424	5234	2110.16	4709	0	0
BBX	HLX	15934	6424	6419	2587.9	4041	0	0
BBX	HMBOX1	15934	6424	5057	2038.8	3638	0	0
BBX	HOXA6	15934	6424	3797	1530.81	3158	0	0
BBX	HOXD9	15934	6424	4526	1824.72	3368	0	0
BBX	IRF3	15934	6424	6529	2632.25	4618	0	0
BBX	IRF6	15934	6424	3660	1475.58	2847	0	0
BBX	IRF7	15934	6424	4515	1820.28	3240	0	0
BBX	JUND	15934	6424	5169	2083.95	3391	0	0
BBX	KLF7	15934	6424	6391	2576.62	4238	0	0
BBX	MAFG	15934	6424	4981	2008.16	3160	0	0
BBX	MAX	15934	6424	3125	1259.88	2539	0	0
BBX	MAZ	15934	6424	5582	2250.46	4307	0	0
BBX	MECP2	15934	6424	7165	2888.66	4296	0	0
BBX	MEF2A	15934	6424	5629	2269.4	4006	0	0
BBX	MSX1	15934	6424	3665	1477.59	2875	0	0
BBX	MXD3	15934	6424	6186	2493.97	4209	0	0
BBX	NFATC4	15934	6424	4877	1966.23	3178	0	0
BBX	NFE2L1	15934	6424	4134	1666.68	2867	0	0
BBX	NFE2L2	15934	6424	4690	1890.83	3238	0	0
BBX	NFIC	15934	6424	6411	2584.68	4638	0	0
BBX	NFKB2	15934	6424	7096	2860.84	4048	0	0
BBX	NFYA	15934	6424	3739	1507.43	2971	0	0
BBX	NR1H2	15934	6424	6180	2491.55	3977	0	0
BBX	NR2C2	15934	6424	7461	3008	5280	0	0
BBX	NR2F6	15934	6424	5797	2337.14	4408	0	0
BBX	NR6A1	15934	6424	4089	1648.53	2714	0	0
BBX	PBX1	15934	6424	3918	1579.59	2917	0	0
BBX	PRRX2	15934	6424	6687	2695.95	4077	0	0
BBX	RARA	15934	6424	3956	1594.91	2744	0	0
BBX	RBPJ	15934	6424	5590	2253.68	4423	0	0
BBX	REL	15934	6424	5956	2401.24	4215	0	0
BBX	RELA	15934	6424	4982	2008.56	3123	0	0
BBX	RFX3	15934	6424	6203	2500.82	4112	0	0
BBX	RFX5	15934	6424	6898	2781.02	4338	0	0
BBX	RFX7	15934	6424	5655	2279.89	3802	0	0
BBX	RFXANK	15934	6424	6553	2641.93	5029	0	0
BBX	RREB1	15934	6424	5786	2332.7	4118	0	0
BBX	SATB1	15934	6424	6040	2435.1	4476	0	0
BBX	SMAD2	15934	6424	4122	1661.84	2936	0	0
BBX	SMAD4	15934	6424	4951	1996.06	3293	0	0
BBX	SMAD5	15934	6424	5433	2190.38	4291	0	0
BBX	SMAD9	15934	6424	5740	2314.16	3889	0	0
BBX	SOX12	15934	6424	4093	1650.15	2894	0	0
BBX	SOX18	15934	6424	6199	2499.21	3921	0	0
BBX	SP2	15934	6424	4610	1858.58	3247	0	0
BBX	SP3	15934	6424	6974	2811.66	4554	0	0
BBX	SP4	15934	6424	7577	3054.77	5019	0	0
BBX	SPDEF	15934	6424	2108	849.87	1702	0	0
BBX	SREBF2	15934	6424	2629	1059.92	2041	0	0
BBX	STAT1	15934	6424	5027	2026.7	3193	0	0
BBX	STAT5B	15934	6424	3268	1317.54	2591	0	0
BBX	TCF12	15934	6424	5461	2201.67	3518	0	0
BBX	TCF3	15934	6424	4881	1967.84	3492	0	0
BBX	TEAD1	15934	6424	6741	2717.72	4377	0	0
BBX	TFCP2	15934	6424	5711	2302.46	3597	0	0
BBX	TFEB	15934	6424	4597	1853.34	3153	0	0
BBX	TRIM28	15934	6424	5990	2414.95	4426	0	0
BBX	USF1	15934	6424	5916	2385.11	4293	0	0
BBX	USF2	15934	6424	5429	2188.77	3802	0	0
BBX	YY1	15934	6424	4314	1739.25	3335	0	0
BBX	ZBTB33	15934	6424	5625	2267.79	4278	0	0
BBX	ZBTB6	15934	6424	6193	2496.79	3981	0	0
BBX	ZEB1	15934	6424	6373	2569.36	3752	0	0
BBX	ZFX	15934	6424	5405	2179.1	4068	0	0
BBX	ZNF143	15934	6424	3633	1464.69	2621	0	0
BBX	ZNF148	15934	6424	3236	1304.64	2424	0	0
BBX	ZNF281	15934	6424	6743	2718.53	4569	0	0
BBX	ZNF354C	15934	6424	5957	2401.64	3907	0	0
BBX	ZNF628	15934	6424	5135	2070.24	4127	0	0
BBX	ZNF691	15934	6424	5144	2073.87	3453	0	0
BCL6	BHLHE40	15934	2911	3095	565.43	1731	0	0
BCL6	DBP	15934	2911	3377	616.95	1692	0	0
BCL6	DLX4	15934	2911	4239	774.43	1691	0	0
BCL6	EGR3	15934	2911	2485	453.99	1440	0	0
BCL6	FOSB	15934	2911	1597	291.76	972	0	0
BCL6	FOSL2	15934	2911	4280	781.92	1968	0	0
BCL6	FOXC1	15934	2911	6064	1107.84	2114	0	0
BCL6	FOXO1	15934	2911	5880	1074.22	2316	0	0
BCL6	GATA3	15934	2911	4897	894.64	2042	0	0
BCL6	GATA6	15934	2911	5780	1055.95	1982	0	0
BCL6	GLIS3	15934	2911	4828	882.03	2214	0	0
BCL6	IRF4	15934	2911	3034	554.28	1434	0	0
BCL6	IRF8	15934	2911	3317	605.99	1449	0	0
BCL6	JUN	15934	2911	2019	368.85	1181	0	0
BCL6	KLF4	15934	2911	4672	853.53	2147	0	0
BCL6	MAFB	15934	2911	3852	703.73	1894	0	0
BCL6	MAFF	15934	2911	4785	874.18	2169	0	0
BCL6	MAFK	15934	2911	6621	1209.6	2258	0	0
BCL6	MYC	15934	2911	5658	1033.67	2537	0	0
BCL6	NFIL3	15934	2911	5966	1089.94	2387	0	0
BCL6	NFKB1	15934	2911	6135	1120.81	2124	0	0
BCL6	PGR	15934	2911	5476	1000.42	2029	0	0
BCL6	RUNX3	15934	2911	3776	689.84	1657	0	0
BCL6	STAT3	15934	2911	3635	664.08	1854	0	0
BCL6	TBX18	15934	2911	4713	861.02	1947	0	0
BCL6	TGIF1	15934	2911	6781	1238.83	2348	0	0
BCL6	ZBTB3	15934	2911	3329	608.18	1437	0	0
BCL6B	BHLHE41	15934	5362	3835	1290.53	2327	0	0
BCL6B	CDX1	15934	5362	3646	1226.93	2992	0	0
BCL6B	CEBPD	15934	5362	7119	2395.64	3580	0	0
BCL6B	DLX3	15934	5362	4801	1615.6	2863	0	0
BCL6B	DLX5	15934	5362	4589	1544.26	3107	0	0
BCL6B	DMRT3	15934	5362	1712	576.11	1494	0	0
BCL6B	EPAS1	15934	5362	5081	1709.82	3487	0	0
BCL6B	ERG	15934	5362	5359	1803.37	4416	0	0
BCL6B	ESR1	15934	5362	5003	1683.58	3160	0	0
BCL6B	ETS1	15934	5362	5459	1837.03	3902	0	0
BCL6B	ETS2	15934	5362	3500	1177.8	2755	0	0
BCL6B	FLI1	15934	5362	5096	1714.87	4312	0	0
BCL6B	FOSL1	15934	5362	5442	1831.3	3228	0	0
BCL6B	FOXC1	15934	5362	6064	2040.62	4080	0	0
BCL6B	FOXD1	15934	5362	5932	1996.2	3849	0	0
BCL6B	FOXF1	15934	5362	3203	1077.85	2448	0	0
BCL6B	FOXF2	15934	5362	3774	1270	3369	0	0
BCL6B	FOXL1	15934	5362	5470	1840.73	4142	0	0
BCL6B	FOXO1	15934	5362	5880	1978.7	3171	0	0
BCL6B	GATA1	15934	5362	1505	506.45	1310	0	0
BCL6B	GLI3	15934	5362	5828	1961.2	3540	0	0
BCL6B	HES1	15934	5362	5367	1806.07	3788	0	0
BCL6B	HIC1	15934	5362	5409	1820.2	3598	0	0
BCL6B	HLX	15934	5362	6419	2160.08	4318	0	0
BCL6B	IRF1	15934	5362	3168	1066.07	2270	0	0
BCL6B	IRX2	15934	5362	1752	589.57	1569	0	0
BCL6B	JDP2	15934	5362	3355	1129	2920	0	0
BCL6B	JUN	15934	5362	2019	679.42	1583	0	0
BCL6B	LEF1	15934	5362	6205	2088.06	3743	0	0
BCL6B	LHX6	15934	5362	3019	1015.93	2495	0	0
BCL6B	LMO2	15934	5362	4917	1654.63	3251	0	0
BCL6B	MAF	15934	5362	5117	1721.94	3736	0	0
BCL6B	MAFF	15934	5362	4785	1610.22	3189	0	0
BCL6B	MAFK	15934	5362	6621	2228.05	4020	0	0
BCL6B	MECOM	15934	5362	3737	1257.55	2741	0	0
BCL6B	MEF2C	15934	5362	5675	1909.71	3992	0	0
BCL6B	MSX2	15934	5362	5128	1725.64	2992	0	0
BCL6B	MYBL1	15934	5362	5204	1751.21	3255	0	0
BCL6B	MYC	15934	5362	5658	1903.99	3183	0	0
BCL6B	NFATC1	15934	5362	6432	2164.45	4645	0	0
BCL6B	NFATC4	15934	5362	4877	1641.17	2735	0	0
BCL6B	NFE2	15934	5362	2137	719.13	1795	0	0
BCL6B	NFIB	15934	5362	6764	2276.17	4259	0	0
BCL6B	NFIL3	15934	5362	5966	2007.64	3228	0	0
BCL6B	NFKB2	15934	5362	7096	2387.9	3828	0	0
BCL6B	NR1I2	15934	5362	4839	1628.39	2713	0	0
BCL6B	NR2F2	15934	5362	4641	1561.76	3081	0	0
BCL6B	NR5A2	15934	5362	4050	1362.88	3166	0	0
BCL6B	OSR2	15934	5362	6057	2038.26	3252	0	0
BCL6B	PPARG	15934	5362	4861	1635.79	3895	0	0
BCL6B	PRDM1	15934	5362	4678	1574.21	3891	0	0
BCL6B	PRRX1	15934	5362	5303	1784.53	3754	0	0
BCL6B	PRRX2	15934	5362	6687	2250.26	3734	0	0
BCL6B	RFX5	15934	5362	6898	2321.27	3650	0	0
BCL6B	RUNX3	15934	5362	3776	1270.67	2807	0	0
BCL6B	SMAD6	15934	5362	4865	1637.14	3344	0	0
BCL6B	SOX11	15934	5362	4130	1389.8	2674	0	0
BCL6B	SOX13	15934	5362	4789	1611.56	3141	0	0
BCL6B	SOX17	15934	5362	5108	1718.91	4047	0	0
BCL6B	SOX18	15934	5362	6199	2086.04	4132	0	0
BCL6B	SOX21	15934	5362	2310	777.35	2102	0	0
BCL6B	SOX8	15934	5362	4248	1429.51	2725	0	0
BCL6B	SPI1	15934	5362	5223	1757.61	2874	0	0
BCL6B	TAL1	15934	5362	5037	1695.02	4188	0	0
BCL6B	TBX15	15934	5362	4029	1355.81	3041	0	0
BCL6B	TBX18	15934	5362	4713	1585.99	3158	0	0
BCL6B	TFAP2C	15934	5362	4648	1564.11	2931	0	0
BCL6B	TGIF1	15934	5362	6781	2281.9	3972	0	0
BCL6B	TGIF2	15934	5362	7192	2420.2	4395	0	0
BCL6B	TP63	15934	5362	1888	635.34	1477	0	0
BCL6B	VSX1	15934	5362	5685	1913.08	3249	0	0
BCL6B	WT1	15934	5362	2257	759.51	1670	0	0
BHLHE40	EGR2	15934	3095	1723	334.67	1260	0	0
BHLHE40	EGR3	15934	3095	2485	482.68	1974	0	0
BHLHE40	ETS2	15934	3095	3500	679.84	1749	0	0
BHLHE40	FOS	15934	3095	941	182.78	847	0	0
BHLHE40	FOSB	15934	3095	1597	310.2	1417	0	0
BHLHE40	FOSL1	15934	3095	5442	1057.05	2245	0	0
BHLHE40	FOSL2	15934	3095	4280	831.34	1792	0	0
BHLHE40	FOXC1	15934	3095	6064	1177.86	2216	0	0
BHLHE40	GFI1B	15934	3095	1639	318.36	1009	0	0
BHLHE40	HIC1	15934	3095	5409	1050.64	2053	0	0
BHLHE40	IRF1	15934	3095	3168	615.35	1662	0	0
BHLHE40	IRF4	15934	3095	3034	589.32	1707	0	0
BHLHE40	IRF8	15934	3095	3317	644.29	1571	0	0
BHLHE40	JDP2	15934	3095	3355	651.67	1564	0	0
BHLHE40	JUN	15934	3095	2019	392.17	1192	0	0
BHLHE40	JUNB	15934	3095	1762	342.25	1152	0	0
BHLHE40	KLF4	15934	3095	4672	907.48	2025	0	0
BHLHE40	MAFB	15934	3095	3852	748.21	1752	0	0
BHLHE40	MAFF	15934	3095	4785	929.43	2531	0	0
BHLHE40	MYC	15934	3095	5658	1099	2488	0	0
BHLHE40	NFE2	15934	3095	2137	415.09	1151	0	0
BHLHE40	NFIL3	15934	3095	5966	1158.83	2517	0	0
BHLHE40	NR4A1	15934	3095	2232	433.54	1463	0	0
BHLHE40	NR4A2	15934	3095	1791	347.88	1239	0	0
BHLHE40	PRDM1	15934	3095	4678	908.65	2035	0	0
BHLHE40	RUNX3	15934	3095	3776	733.45	1803	0	0
BHLHE40	SOX17	15934	3095	5108	992.17	1970	0	0
BHLHE40	STAT3	15934	3095	3635	706.06	1702	0	0
BHLHE40	TGIF1	15934	3095	6781	1317.13	2367	0	0
BHLHE40	WT1	15934	3095	2257	438.4	1234	0	0
BHLHE40	ZBTB3	15934	3095	3329	646.62	1823	0	0
BHLHE41	CBFB	15934	3835	4405	1060.2	2155	0	0
BHLHE41	CDX1	15934	3835	3646	877.52	1978	0	0
BHLHE41	CEBPB	15934	3835	7021	1689.82	3172	0	0
BHLHE41	CEBPD	15934	3835	7119	1713.4	3085	0	0
BHLHE41	DLX3	15934	3835	4801	1155.51	2607	0	0
BHLHE41	DLX4	15934	3835	4239	1020.24	2234	0	0
BHLHE41	ESR1	15934	3835	5003	1204.12	2625	0	0
BHLHE41	ETV6	15934	3835	5446	1310.74	2483	0	0
BHLHE41	EWSR1	15934	3835	4241	1020.73	2039	0	0
BHLHE41	FOSL1	15934	3835	5442	1309.78	2522	0	0
BHLHE41	FOXC1	15934	3835	6064	1459.49	2947	0	0
BHLHE41	FOXD1	15934	3835	5932	1427.72	3022	0	0
BHLHE41	FOXL1	15934	3835	5470	1316.52	2482	0	0
BHLHE41	GATA2	15934	3835	4630	1114.35	2338	0	0
BHLHE41	GATA4	15934	3835	3245	781.01	1835	0	0
BHLHE41	GATA6	15934	3835	5780	1391.13	2480	0	0
BHLHE41	GLI1	15934	3835	4190	1008.45	2251	0	0
BHLHE41	HES1	15934	3835	5367	1291.73	2623	0	0
BHLHE41	HLX	15934	3835	6419	1544.93	2767	0	0
BHLHE41	HOXB9	15934	3835	2524	607.48	1422	0	0
BHLHE41	HOXC10	15934	3835	2950	710.01	1655	0	0
BHLHE41	HOXC6	15934	3835	3386	814.94	1960	0	0
BHLHE41	IRF6	15934	3835	3660	880.89	1831	0	0
BHLHE41	LEF1	15934	3835	6205	1493.42	3121	0	0
BHLHE41	MAF	15934	3835	5117	1231.56	2396	0	0
BHLHE41	MAFF	15934	3835	4785	1151.66	2231	0	0
BHLHE41	MAFK	15934	3835	6621	1593.54	3177	0	0
BHLHE41	MECP2	15934	3835	7165	1724.47	3337	0	0
BHLHE41	MEF2C	15934	3835	5675	1365.86	2764	0	0
BHLHE41	MSX2	15934	3835	5128	1234.21	2971	0	0
BHLHE41	MYBL1	15934	3835	5204	1252.5	2677	0	0
BHLHE41	NFATC1	15934	3835	6432	1548.06	3191	0	0
BHLHE41	NFATC4	15934	3835	4877	1173.8	2680	0	0
BHLHE41	NFIA	15934	3835	6056	1457.56	2873	0	0
BHLHE41	NFIB	15934	3835	6764	1627.96	3284	0	0
BHLHE41	NFIL3	15934	3835	5966	1435.9	2651	0	0
BHLHE41	NFKB2	15934	3835	7096	1707.87	3215	0	0
BHLHE41	NR1H3	15934	3835	6228	1498.96	2747	0	0
BHLHE41	NR1I2	15934	3835	4839	1164.65	2345	0	0
BHLHE41	NR2C2	15934	3835	7461	1795.72	2904	0	0
BHLHE41	OSR2	15934	3835	6057	1457.8	3040	0	0
BHLHE41	PLAGL1	15934	3835	5843	1406.3	2472	0	0
BHLHE41	POU2F2	15934	3835	4450	1071.03	2353	0	0
BHLHE41	PPARG	15934	3835	4861	1169.95	2274	0	0
BHLHE41	PRRX1	15934	3835	5303	1276.33	2678	0	0
BHLHE41	PRRX2	15934	3835	6687	1609.43	3200	0	0
BHLHE41	RELA	15934	3835	4982	1199.07	2633	0	0
BHLHE41	RFX5	15934	3835	6898	1660.21	3161	0	0
BHLHE41	RFX7	15934	3835	5655	1361.05	2389	0	0
BHLHE41	SATB1	15934	3835	6040	1453.71	2564	0	0
BHLHE41	SMAD6	15934	3835	4865	1170.91	2401	0	0
BHLHE41	SOX17	15934	3835	5108	1229.4	2236	0	0
BHLHE41	SOX18	15934	3835	6199	1491.98	2747	0	0
BHLHE41	SP3	15934	3835	6974	1678.5	2703	0	0
BHLHE41	SP4	15934	3835	7577	1823.63	3261	0	0
BHLHE41	TAL1	15934	3835	5037	1212.31	2394	0	0
BHLHE41	TAL2	15934	3835	3023	727.58	1652	0	0
BHLHE41	TBX18	15934	3835	4713	1134.33	2117	0	0
BHLHE41	TEAD1	15934	3835	6741	1622.43	2655	0	0
BHLHE41	TFAP2B	15934	3835	5484	1319.89	2898	0	0
BHLHE41	TGIF1	15934	3835	6781	1632.05	3081	0	0
BHLHE41	TGIF2	15934	3835	7192	1730.97	3316	0	0
BHLHE41	TP53	15934	3835	3254	783.17	1674	0	0
BHLHE41	VSX1	15934	3835	5685	1368.27	2971	0	0
BHLHE41	ZBTB6	15934	3835	6193	1490.53	2773	0	0
BHLHE41	ZBTB7A	15934	3835	5551	1336.02	2683	0	0
BHLHE41	ZEB1	15934	3835	6373	1533.86	2699	0	0
BPTF	BRCA1	15934	7193	4229	1909.07	3862	0	0
BPTF	CDC5L	15934	7193	3952	1784.03	2983	0	0
BPTF	CEBPB	15934	7193	7021	3169.45	5178	0	0
BPTF	CEBPD	15934	7193	7119	3213.69	5000	0	0
BPTF	CLOCK	15934	7193	7033	3174.87	5675	0	0
BPTF	CREB1	15934	7193	6109	2757.75	5092	0	0
BPTF	CTCF	15934	7193	5700	2573.12	5084	0	0
BPTF	E4F1	15934	7193	5872	2650.77	4176	0	0
BPTF	ELF2	15934	7193	4224	1906.82	3097	0	0
BPTF	ELK3	15934	7193	6393	2885.96	4071	0	0
BPTF	ELK4	15934	7193	5091	2298.2	3790	0	0
BPTF	EP300	15934	7193	5392	2434.08	4408	0	0
BPTF	ESRRA	15934	7193	3587	1619.26	2657	0	0
BPTF	ETV3	15934	7193	6650	3001.97	4999	0	0
BPTF	EWSR1	15934	7193	4241	1914.49	3420	0	0
BPTF	FOSL1	15934	7193	5442	2456.65	3962	0	0
BPTF	FOXK1	15934	7193	3826	1727.15	3214	0	0
BPTF	FOXO3	15934	7193	3554	1604.36	2683	0	0
BPTF	GABPA	15934	7193	3781	1706.84	3240	0	0
BPTF	GTF2I	15934	7193	6644	2999.27	5417	0	0
BPTF	HDX	15934	7193	6872	3102.19	5546	0	0
BPTF	HLTF	15934	7193	5234	2362.76	3990	0	0
BPTF	HLX	15934	7193	6419	2897.69	4294	0	0
BPTF	HMBOX1	15934	7193	5057	2282.85	3413	0	0
BPTF	HOXA6	15934	7193	3797	1714.06	3104	0	0
BPTF	IKZF2	15934	7193	3158	1425.6	2607	0	0
BPTF	IRF3	15934	7193	6529	2947.35	5176	0	0
BPTF	IRF6	15934	7193	3660	1652.21	2779	0	0
BPTF	IRF7	15934	7193	4515	2038.18	3376	0	0
BPTF	JUND	15934	7193	5169	2333.41	4374	0	0
BPTF	KLF12	15934	7193	4247	1917.2	3566	0	0
BPTF	KLF7	15934	7193	6391	2885.05	4896	0	0
BPTF	LHX4	15934	7193	2906	1311.84	2509	0	0
BPTF	MAFG	15934	7193	4981	2248.55	3984	0	0
BPTF	MAX	15934	7193	3125	1410.7	2491	0	0
BPTF	MECP2	15934	7193	7165	3234.46	5124	0	0
BPTF	MEF2A	15934	7193	5629	2541.07	3997	0	0
BPTF	MSX1	15934	7193	3665	1654.47	3121	0	0
BPTF	MXD1	15934	7193	3566	1609.78	2855	0	0
BPTF	MXD3	15934	7193	6186	2792.51	4565	0	0
BPTF	NFATC4	15934	7193	4877	2201.6	3709	0	0
BPTF	NFE2L1	15934	7193	4134	1866.19	3349	0	0
BPTF	NFIC	15934	7193	6411	2894.08	4460	0	0
BPTF	NFKB2	15934	7193	7096	3203.31	5349	0	0
BPTF	NFYA	15934	7193	3739	1687.88	3071	0	0
BPTF	NR1H2	15934	7193	6180	2789.8	5345	0	0
BPTF	NR2C2	15934	7193	7461	3368.08	6094	0	0
BPTF	NR2F6	15934	7193	5797	2616.91	3980	0	0
BPTF	NR3C1	15934	7193	4372	1973.63	3254	0	0
BPTF	NR6A1	15934	7193	4089	1845.88	3295	0	0
BPTF	PARP1	15934	7193	4491	2027.35	3612	0	0
BPTF	POU4F3	15934	7193	1853	836.49	1714	0	0
BPTF	PRRX2	15934	7193	6687	3018.68	4406	0	0
BPTF	RBPJ	15934	7193	5590	2523.46	4341	0	0
BPTF	REL	15934	7193	5956	2688.69	4447	0	0
BPTF	RELA	15934	7193	4982	2249	3470	0	0
BPTF	RFX3	15934	7193	6203	2800.19	5123	0	0
BPTF	RFX5	15934	7193	6898	3113.93	4408	0	0
BPTF	RFX7	15934	7193	5655	2552.81	4990	0	0
BPTF	RFXANK	15934	7193	6553	2958.19	4856	0	0
BPTF	RREB1	15934	7193	5786	2611.94	3936	0	0
BPTF	SATB1	15934	7193	6040	2726.6	4432	0	0
BPTF	SMAD4	15934	7193	4951	2235	4528	0	0
BPTF	SMAD5	15934	7193	5433	2452.59	4688	0	0
BPTF	SMAD9	15934	7193	5740	2591.18	5189	0	0
BPTF	SOX18	15934	7193	6199	2798.38	4294	0	0
BPTF	SOX5	15934	7193	4678	2111.76	3814	0	0
BPTF	SP2	15934	7193	4610	2081.07	3968	0	0
BPTF	SP3	15934	7193	6974	3148.24	5795	0	0
BPTF	SP4	15934	7193	7577	3420.44	5803	0	0
BPTF	SPI1	15934	7193	5223	2357.79	3501	0	0
BPTF	STAT2	15934	7193	2222	1003.07	1834	0	0
BPTF	TCF12	15934	7193	5461	2465.23	3910	0	0
BPTF	TEAD1	15934	7193	6741	3043.05	5586	0	0
BPTF	TFCP2	15934	7193	5711	2578.09	4792	0	0
BPTF	TRIM28	15934	7193	5990	2704.03	3933	0	0
BPTF	USF1	15934	7193	5916	2670.63	4919	0	0
BPTF	USF2	15934	7193	5429	2450.78	3916	0	0
BPTF	YY1	15934	7193	4314	1947.45	3321	0	0
BPTF	ZBTB33	15934	7193	5625	2539.26	4555	0	0
BPTF	ZBTB6	15934	7193	6193	2795.67	5262	0	0
BPTF	ZBTB7A	15934	7193	5551	2505.86	4370	0	0
BPTF	ZEB1	15934	7193	6373	2876.93	4681	0	0
BPTF	ZFX	15934	7193	5405	2439.95	4622	0	0
BPTF	ZNF143	15934	7193	3633	1640.03	2856	0	0
BPTF	ZNF281	15934	7193	6743	3043.96	5535	0	0
BPTF	ZNF354C	15934	7193	5957	2689.14	5145	0	0
BPTF	ZNF628	15934	7193	5135	2318.07	3702	0	0
BPTF	ZNF8	15934	7193	4508	2035.02	3648	0	0
BRCA1	CDC5L	15934	4229	3952	1048.89	2354	0	0
BRCA1	CEBPB	15934	4229	7021	1863.42	3409	0	0
BRCA1	CEBPD	15934	4229	7119	1889.43	3166	0	0
BRCA1	CLOCK	15934	4229	7033	1866.61	3681	0	0
BRCA1	CREB1	15934	4229	6109	1621.37	3354	0	0
BRCA1	CTCF	15934	4229	5700	1512.82	3289	0	0
BRCA1	E4F1	15934	4229	5872	1558.47	2949	0	0
BRCA1	ELK4	15934	4229	5091	1351.19	2645	0	0
BRCA1	EP300	15934	4229	5392	1431.08	2912	0	0
BRCA1	ESRRA	15934	4229	3587	952.02	1902	0	0
BRCA1	ETV3	15934	4229	6650	1764.96	3385	0	0
BRCA1	EWSR1	15934	4229	4241	1125.59	2595	0	0
BRCA1	FOSL1	15934	4229	5442	1444.35	2554	0	0
BRCA1	FOXK1	15934	4229	3826	1015.45	2199	0	0
BRCA1	FOXO3	15934	4229	3554	943.26	1948	0	0
BRCA1	GABPA	15934	4229	3781	1003.51	2127	0	0
BRCA1	GTF2I	15934	4229	6644	1763.37	3543	0	0
BRCA1	HDX	15934	4229	6872	1823.88	3673	0	0
BRCA1	HLTF	15934	4229	5234	1389.14	2992	0	0
BRCA1	HLX	15934	4229	6419	1703.65	2806	0	0
BRCA1	HMBOX1	15934	4229	5057	1342.16	2441	0	0
BRCA1	HOXA6	15934	4229	3797	1007.75	2322	0	0
BRCA1	HOXD9	15934	4229	4526	1201.23	2208	0	0
BRCA1	IRF3	15934	4229	6529	1732.84	3577	0	0
BRCA1	IRF6	15934	4229	3660	971.39	2150	0	0
BRCA1	IRF7	15934	4229	4515	1198.31	2376	0	0
BRCA1	JUND	15934	4229	5169	1371.89	3002	0	0
BRCA1	KLF12	15934	4229	4247	1127.18	2348	0	0
BRCA1	KLF7	15934	4229	6391	1696.22	3294	0	0
BRCA1	LHX4	15934	4229	2906	771.27	1682	0	0
BRCA1	MAFG	15934	4229	4981	1321.99	2898	0	0
BRCA1	MAX	15934	4229	3125	829.4	1963	0	0
BRCA1	MAZ	15934	4229	5582	1481.5	2700	0	0
BRCA1	MECP2	15934	4229	7165	1901.64	3372	0	0
BRCA1	MEF2A	15934	4229	5629	1493.98	2805	0	0
BRCA1	MSX1	15934	4229	3665	972.72	2389	0	0
BRCA1	MXD1	15934	4229	3566	946.44	2088	0	0
BRCA1	MXD3	15934	4229	6186	1641.81	3097	0	0
BRCA1	NFATC4	15934	4229	4877	1294.39	2538	0	0
BRCA1	NFE2L1	15934	4229	4134	1097.19	2576	0	0
BRCA1	NFIC	15934	4229	6411	1701.53	3064	0	0
BRCA1	NFKB2	15934	4229	7096	1883.33	3294	0	0
BRCA1	NFYA	15934	4229	3739	992.36	2308	0	0
BRCA1	NR1H2	15934	4229	6180	1640.22	3379	0	0
BRCA1	NR2C2	15934	4229	7461	1980.2	3838	0	0
BRCA1	NR2F6	15934	4229	5797	1538.57	2790	0	0
BRCA1	NR3C1	15934	4229	4372	1160.36	2492	0	0
BRCA1	NR6A1	15934	4229	4089	1085.25	2308	0	0
BRCA1	PARP1	15934	4229	4491	1191.94	2576	0	0
BRCA1	POU4F3	15934	4229	1853	491.8	1485	0	0
BRCA1	PRRX2	15934	4229	6687	1774.78	3083	0	0
BRCA1	RBPJ	15934	4229	5590	1483.63	3072	0	0
BRCA1	REL	15934	4229	5956	1580.77	3027	0	0
BRCA1	RFX3	15934	4229	6203	1646.32	3409	0	0
BRCA1	RFX5	15934	4229	6898	1830.78	3060	0	0
BRCA1	RFX7	15934	4229	5655	1500.88	3221	0	0
BRCA1	RFXANK	15934	4229	6553	1739.21	3333	0	0
BRCA1	RREB1	15934	4229	5786	1535.65	2693	0	0
BRCA1	SATB1	15934	4229	6040	1603.06	3183	0	0
BRCA1	SMAD4	15934	4229	4951	1314.03	2969	0	0
BRCA1	SMAD5	15934	4229	5433	1441.96	3231	0	0
BRCA1	SMAD9	15934	4229	5740	1523.44	3486	0	0
BRCA1	SOX18	15934	4229	6199	1645.26	2849	0	0
BRCA1	SOX5	15934	4229	4678	1241.58	2631	0	0
BRCA1	SP2	15934	4229	4610	1223.53	2963	0	0
BRCA1	SP3	15934	4229	6974	1850.95	3696	0	0
BRCA1	SP4	15934	4229	7577	2010.99	3683	0	0
BRCA1	STAT1	15934	4229	5027	1334.2	2378	0	0
BRCA1	STAT2	15934	4229	2222	589.74	1421	0	0
BRCA1	TCF12	15934	4229	5461	1449.39	2721	0	0
BRCA1	TEAD1	15934	4229	6741	1789.11	3640	0	0
BRCA1	TFCP2	15934	4229	5711	1515.74	3135	0	0
BRCA1	TRIM28	15934	4229	5990	1589.79	2799	0	0
BRCA1	USF1	15934	4229	5916	1570.15	3290	0	0
BRCA1	USF2	15934	4229	5429	1440.9	2749	0	0
BRCA1	YY1	15934	4229	4314	1144.97	2153	0	0
BRCA1	ZBTB33	15934	4229	5625	1492.92	3348	0	0
BRCA1	ZBTB6	15934	4229	6193	1643.67	3374	0	0
BRCA1	ZBTB7A	15934	4229	5551	1473.28	2966	0	0
BRCA1	ZEB1	15934	4229	6373	1691.44	3250	0	0
BRCA1	ZFX	15934	4229	5405	1434.53	3038	0	0
BRCA1	ZNF281	15934	4229	6743	1789.64	3564	0	0
BRCA1	ZNF354C	15934	4229	5957	1581.03	3290	0	0
BRCA1	ZNF628	15934	4229	5135	1362.87	2757	0	0
BRCA1	ZNF691	15934	4229	5144	1365.26	2468	0	0
BRCA1	ZNF8	15934	4229	4508	1196.46	2465	0	0
CBFB	DLX3	15934	4405	4801	1327.25	2397	0	0
CBFB	EPAS1	15934	4405	5081	1404.66	2562	0	0
CBFB	FEV	15934	4405	4765	1317.3	2584	0	0
CBFB	FGF9	15934	4405	3073	849.54	1796	0	0
CBFB	FOXD1	15934	4405	5932	1639.92	3037	0	0
CBFB	FOXL1	15934	4405	5470	1512.2	2695	0	0
CBFB	FOXP3	15934	4405	2689	743.38	1822	0	0
CBFB	GLI1	15934	4405	4190	1158.34	2642	0	0
CBFB	GLIS2	15934	4405	2562	708.27	1555	0	0
CBFB	HOXC10	15934	4405	2950	815.54	2440	0	0
CBFB	HOXC5	15934	4405	2072	572.81	1362	0	0
CBFB	HOXC6	15934	4405	3386	936.07	2253	0	0
CBFB	HOXC8	15934	4405	3863	1067.94	2759	0	0
CBFB	ISL2	15934	4405	2983	824.66	2085	0	0
CBFB	LEF1	15934	4405	6205	1715.39	2966	0	0
CBFB	MECP2	15934	4405	7165	1980.78	3100	0	0
CBFB	MSX2	15934	4405	5128	1417.65	2495	0	0
CBFB	MYBL1	15934	4405	5204	1438.66	2714	0	0
CBFB	NFATC1	15934	4405	6432	1778.14	2869	0	0
CBFB	NFIB	15934	4405	6764	1869.93	3042	0	0
CBFB	NFYC	15934	4405	4589	1268.64	2417	0	0
CBFB	NHLH1	15934	4405	3268	903.45	2090	0	0
CBFB	NR1I2	15934	4405	4839	1337.76	2966	0	0
CBFB	ONECUT2	15934	4405	3290	909.53	2348	0	0
CBFB	PAX5	15934	4405	4200	1161.1	2517	0	0
CBFB	POU2F2	15934	4405	4450	1230.22	2576	0	0
CBFB	POU3F1	15934	4405	3433	949.06	2135	0	0
CBFB	POU3F2	15934	4405	1985	548.76	1325	0	0
CBFB	POU3F3	15934	4405	3849	1064.07	2639	0	0
CBFB	PRRX1	15934	4405	5303	1466.03	2530	0	0
CBFB	RFX5	15934	4405	6898	1906.97	3464	0	0
CBFB	RORB	15934	4405	3755	1038.08	2169	0	0
CBFB	SIX3	15934	4405	1948	538.53	1427	0	0
CBFB	SMAD6	15934	4405	4865	1344.94	2784	0	0
CBFB	STAT4	15934	4405	3947	1091.16	2667	0	0
CBFB	TAL2	15934	4405	3023	835.72	2203	0	0
CBFB	TFAP2B	15934	4405	5484	1516.07	2727	0	0
CBFB	TFAP2C	15934	4405	4648	1284.95	2440	0	0
CBFB	TGIF2	15934	4405	7192	1988.25	3220	0	0
CBFB	THRB	15934	4405	3633	1004.35	2212	0	0
CBFB	TLX1	15934	4405	2804	775.17	1960	0	0
CBFB	TRIM28	15934	4405	5990	1655.95	2737	0	0
CBFB	VSX1	15934	4405	5685	1571.63	3179	0	0
CBFB	ZNF691	15934	4405	5144	1422.07	2497	0	0
CDC5L	CEBPB	15934	3952	7021	1741.37	3036	0	0
CDC5L	CEBPD	15934	3952	7119	1765.68	2880	0	0
CDC5L	CLOCK	15934	3952	7033	1744.35	2844	0	0
CDC5L	CREB1	15934	3952	6109	1515.17	2940	0	0
CDC5L	CTCF	15934	3952	5700	1413.73	2738	0	0
CDC5L	ESRRA	15934	3952	3587	889.66	1833	0	0
CDC5L	ETV3	15934	3952	6650	1649.35	2698	0	0
CDC5L	EWSR1	15934	3952	4241	1051.87	2261	0	0
CDC5L	GATA2	15934	3952	4630	1148.35	2294	0	0
CDC5L	GATA4	15934	3952	3245	804.83	1733	0	0
CDC5L	GTF2I	15934	3952	6644	1647.87	2770	0	0
CDC5L	HDX	15934	3952	6872	1704.41	2997	0	0
CDC5L	HLTF	15934	3952	5234	1298.15	2402	0	0
CDC5L	IRF3	15934	3952	6529	1619.34	2992	0	0
CDC5L	IRF6	15934	3952	3660	907.76	2126	0	0
CDC5L	MECP2	15934	3952	7165	1777.09	3111	0	0
CDC5L	MSX1	15934	3952	3665	909	2028	0	0
CDC5L	MSX2	15934	3952	5128	1271.86	2279	0	0
CDC5L	NFATC4	15934	3952	4877	1209.61	2683	0	0
CDC5L	NFE2L1	15934	3952	4134	1025.33	2214	0	0
CDC5L	NFKB2	15934	3952	7096	1759.97	2910	0	0
CDC5L	NFYA	15934	3952	3739	927.36	1899	0	0
CDC5L	NR1H2	15934	3952	6180	1532.78	2603	0	0
CDC5L	NR1H3	15934	3952	6228	1544.69	2749	0	0
CDC5L	NR2C2	15934	3952	7461	1850.5	3357	0	0
CDC5L	NR3C1	15934	3952	4372	1084.36	2243	0	0
CDC5L	PAX8	15934	3952	1388	344.26	992	0	0
CDC5L	PRRX2	15934	3952	6687	1658.53	3009	0	0
CDC5L	RBPJ	15934	3952	5590	1386.45	2588	0	0
CDC5L	RELA	15934	3952	4982	1235.65	2287	0	0
CDC5L	RFX3	15934	3952	6203	1538.49	2647	0	0
CDC5L	RFX5	15934	3952	6898	1710.86	2849	0	0
CDC5L	RFXANK	15934	3952	6553	1625.3	2724	0	0
CDC5L	SATB1	15934	3952	6040	1498.06	3007	0	0
CDC5L	SMAD2	15934	3952	4122	1022.35	2029	0	0
CDC5L	SMAD5	15934	3952	5433	1347.51	2591	0	0
CDC5L	SMAD9	15934	3952	5740	1423.65	2731	0	0
CDC5L	SP3	15934	3952	6974	1729.71	3344	0	0
CDC5L	SP4	15934	3952	7577	1879.27	3266	0	0
CDC5L	TEAD1	15934	3952	6741	1671.92	3169	0	0
CDC5L	TRIM28	15934	3952	5990	1485.66	2602	0	0
CDC5L	USF1	15934	3952	5916	1467.3	2790	0	0
CDC5L	ZBTB33	15934	3952	5625	1395.13	2662	0	0
CDC5L	ZBTB6	15934	3952	6193	1536.01	2904	0	0
CDC5L	ZBTB7A	15934	3952	5551	1376.78	2520	0	0
CDC5L	ZEB1	15934	3952	6373	1580.65	3099	0	0
CDC5L	ZNF281	15934	3952	6743	1672.42	2758	0	0
CDC5L	ZNF628	15934	3952	5135	1273.6	2611	0	0
CDX1	CEBPD	15934	3646	7119	1628.96	2785	0	0
CDX1	DLX3	15934	3646	4801	1098.56	2541	0	0
CDX1	DLX5	15934	3646	4589	1050.05	2593	0	0
CDX1	DMRT3	15934	3646	1712	391.74	1235	0	0
CDX1	EMX2	15934	3646	1783	407.98	1183	0	0
CDX1	EPAS1	15934	3646	5081	1162.63	2438	0	0
CDX1	ERG	15934	3646	5359	1226.24	2855	0	0
CDX1	ESR1	15934	3646	5003	1144.78	2555	0	0
CDX1	ETS1	15934	3646	5459	1249.12	2414	0	0
CDX1	ETS2	15934	3646	3500	800.87	1810	0	0
CDX1	ETV6	15934	3646	5446	1246.15	2382	0	0
CDX1	FLI1	15934	3646	5096	1166.06	2951	0	0
CDX1	FOSL1	15934	3646	5442	1245.23	2278	0	0
CDX1	FOXC1	15934	3646	6064	1387.56	2887	0	0
CDX1	FOXD1	15934	3646	5932	1357.35	3246	0	0
CDX1	FOXF1	15934	3646	3203	732.91	1797	0	0
CDX1	FOXF2	15934	3646	3774	863.56	2688	0	0
CDX1	FOXL1	15934	3646	5470	1251.64	3203	0	0
CDX1	GATA1	15934	3646	1505	344.37	1060	0	0
CDX1	GLI1	15934	3646	4190	958.75	2330	0	0
CDX1	GLI3	15934	3646	5828	1333.56	2756	0	0
CDX1	GSC	15934	3646	2293	524.68	1386	0	0
CDX1	HES1	15934	3646	5367	1228.07	2878	0	0
CDX1	HIC1	15934	3646	5409	1237.68	2639	0	0
CDX1	HLX	15934	3646	6419	1468.79	3442	0	0
CDX1	HOXB9	15934	3646	2524	577.54	1659	0	0
CDX1	HOXD9	15934	3646	4526	1035.63	2412	0	0
CDX1	IRF6	15934	3646	3660	837.48	1914	0	0
CDX1	IRX2	15934	3646	1752	400.89	1428	0	0
CDX1	JDP2	15934	3646	3355	767.69	2173	0	0
CDX1	LEF1	15934	3646	6205	1419.82	3063	0	0
CDX1	LHX6	15934	3646	3019	690.8	1992	0	0
CDX1	LMO2	15934	3646	4917	1125.1	2881	0	0
CDX1	MAF	15934	3646	5117	1170.87	2839	0	0
CDX1	MAFK	15934	3646	6621	1515.01	3002	0	0
CDX1	MECOM	15934	3646	3737	855.1	1842	0	0
CDX1	MECP2	15934	3646	7165	1639.49	2921	0	0
CDX1	MEF2C	15934	3646	5675	1298.55	3092	0	0
CDX1	MSX2	15934	3646	5128	1173.38	2511	0	0
CDX1	MYBL1	15934	3646	5204	1190.77	2689	0	0
CDX1	NFATC1	15934	3646	6432	1471.76	3244	0	0
CDX1	NFATC3	15934	3646	2068	473.2	1233	0	0
CDX1	NFATC4	15934	3646	4877	1115.95	2635	0	0
CDX1	NFE2	15934	3646	2137	488.99	1257	0	0
CDX1	NFIA	15934	3646	6056	1385.73	2532	0	0
CDX1	NFIB	15934	3646	6764	1547.73	3336	0	0
CDX1	NFKB2	15934	3646	7096	1623.7	3042	0	0
CDX1	NKX6-2	15934	3646	2153	492.65	1337	0	0
CDX1	NR1I2	15934	3646	4839	1107.25	2394	0	0
CDX1	NR2F2	15934	3646	4641	1061.95	2529	0	0
CDX1	NR5A2	15934	3646	4050	926.72	2032	0	0
CDX1	NR6A1	15934	3646	4089	935.64	1877	0	0
CDX1	OSR2	15934	3646	6057	1385.96	2689	0	0
CDX1	PPARG	15934	3646	4861	1112.29	3062	0	0
CDX1	PRDM1	15934	3646	4678	1070.41	2261	0	0
CDX1	PRRX1	15934	3646	5303	1213.43	2868	0	0
CDX1	PRRX2	15934	3646	6687	1530.11	3290	0	0
CDX1	RELA	15934	3646	4982	1139.98	2626	0	0
CDX1	RFX5	15934	3646	6898	1578.39	3216	0	0
CDX1	RUNX3	15934	3646	3776	864.02	1998	0	0
CDX1	SIX1	15934	3646	2957	676.62	1698	0	0
CDX1	SMAD6	15934	3646	4865	1113.2	2939	0	0
CDX1	SOX11	15934	3646	4130	945.02	2214	0	0
CDX1	SOX13	15934	3646	4789	1095.81	2545	0	0
CDX1	SOX17	15934	3646	5108	1168.81	2732	0	0
CDX1	SOX18	15934	3646	6199	1418.45	3397	0	0
CDX1	SOX21	15934	3646	2310	528.57	1706	0	0
CDX1	SOX8	15934	3646	4248	972.02	2463	0	0
CDX1	SP4	15934	3646	7577	1733.76	2892	0	0
CDX1	SPI1	15934	3646	5223	1195.12	2198	0	0
CDX1	TAL1	15934	3646	5037	1152.56	3164	0	0
CDX1	TBX15	15934	3646	4029	921.91	2392	0	0
CDX1	TBX18	15934	3646	4713	1078.42	2230	0	0
CDX1	TCF3	15934	3646	4881	1116.86	2227	0	0
CDX1	TFAP2C	15934	3646	4648	1063.55	2487	0	0
CDX1	TGIF1	15934	3646	6781	1551.62	2868	0	0
CDX1	TGIF2	15934	3646	7192	1645.67	3289	0	0
CDX1	TP53	15934	3646	3254	744.58	2058	0	0
CDX1	TP63	15934	3646	1888	432.01	1226	0	0
CDX1	VSX1	15934	3646	5685	1300.84	2734	0	0
CDX1	ZBTB6	15934	3646	6193	1417.08	2456	0	0
CDX2	FOXA2	15934	834	694	36.32	511	0	0
CDX2	FOXA3	15934	834	937	49.04	510	0	0
CDX2	FOXG1	15934	834	566	29.62	348	0	0
CDX2	HNF4G	15934	834	970	50.77	446	0	0
CDX2	HOXD12	15934	834	1011	52.92	646	0	0
CDX2	NKX2-1	15934	834	984	51.5	726	0	0
CDX2	NKX2-2	15934	834	968	50.67	476	0	0
CDX2	NKX6-3	15934	834	860	45.01	427	0	0
CDX2	OVOL2	15934	834	1149	60.14	505	0	0
CDX2	PAX1	15934	834	788	41.24	477	0	0
CDX2	PDX1	15934	834	1155	60.45	663	0	0
CDX2	PITX2	15934	834	963	50.4	426	0	0
CDX2	POU3F4	15934	834	991	51.87	725	0	0
CDX2	RFX4	15934	834	826	43.23	532	0	0
CEBPB	CEBPD	15934	7021	7119	3136.85	5991	0	0
CEBPB	CLOCK	15934	7021	7033	3098.95	4323	0	0
CEBPB	CREB1	15934	7021	6109	2691.81	4327	0	0
CEBPB	CREM	15934	7021	4692	2067.44	3768	0	0
CEBPB	CTCF	15934	7021	5700	2511.59	4397	0	0
CEBPB	DLX3	15934	7021	4801	2115.47	3503	0	0
CEBPB	DLX4	15934	7021	4239	1867.83	3319	0	0
CEBPB	ESR1	15934	7021	5003	2204.47	3502	0	0
CEBPB	ETV6	15934	7021	5446	2399.67	4156	0	0
CEBPB	EWSR1	15934	7021	4241	1868.71	3536	0	0
CEBPB	FOSL1	15934	7021	5442	2397.91	4515	0	0
CEBPB	FOXC1	15934	7021	6064	2671.98	4362	0	0
CEBPB	FOXD1	15934	7021	5932	2613.82	4022	0	0
CEBPB	GATA2	15934	7021	4630	2040.12	3190	0	0
CEBPB	GATA4	15934	7021	3245	1429.84	2822	0	0
CEBPB	GATA5	15934	7021	3833	1688.94	2747	0	0
CEBPB	GATA6	15934	7021	5780	2546.84	4326	0	0
CEBPB	GLI1	15934	7021	4190	1846.24	2933	0	0
CEBPB	HDX	15934	7021	6872	3028.01	4604	0	0
CEBPB	HES1	15934	7021	5367	2364.86	4115	0	0
CEBPB	HIC1	15934	7021	5409	2383.37	3955	0	0
CEBPB	HLX	15934	7021	6419	2828.4	4298	0	0
CEBPB	HOXA10	15934	7021	1717	756.56	1516	0	0
CEBPB	IRF3	15934	7021	6529	2876.87	4453	0	0
CEBPB	IRF6	15934	7021	3660	1612.71	2711	0	0
CEBPB	IRX3	15934	7021	3389	1493.3	2716	0	0
CEBPB	JUND	15934	7021	5169	2277.62	3531	0	0
CEBPB	KLF12	15934	7021	4247	1871.36	3306	0	0
CEBPB	LEF1	15934	7021	6205	2734.11	4356	0	0
CEBPB	LMO2	15934	7021	4917	2166.58	3283	0	0
CEBPB	MAFF	15934	7021	4785	2108.42	3455	0	0
CEBPB	MAFG	15934	7021	4981	2194.78	3475	0	0
CEBPB	MAFK	15934	7021	6621	2917.41	4834	0	0
CEBPB	MECP2	15934	7021	7165	3157.11	5383	0	0
CEBPB	MEF2C	15934	7021	5675	2500.58	3658	0	0
CEBPB	MSX1	15934	7021	3665	1614.91	2771	0	0
CEBPB	MSX2	15934	7021	5128	2259.55	4174	0	0
CEBPB	MYBL1	15934	7021	5204	2293.04	3428	0	0
CEBPB	NFATC1	15934	7021	6432	2834.13	4208	0	0
CEBPB	NFATC4	15934	7021	4877	2148.95	4010	0	0
CEBPB	NFE2L1	15934	7021	4134	1821.56	3132	0	0
CEBPB	NFIA	15934	7021	6056	2668.46	4680	0	0
CEBPB	NFIB	15934	7021	6764	2980.42	4598	0	0
CEBPB	NFIL3	15934	7021	5966	2628.8	4029	0	0
CEBPB	NFKB2	15934	7021	7096	3126.71	5684	0	0
CEBPB	NR0B1	15934	7021	3154	1389.75	2486	0	0
CEBPB	NR1H2	15934	7021	6180	2723.09	4602	0	0
CEBPB	NR1H3	15934	7021	6228	2744.24	4605	0	0
CEBPB	NR2C2	15934	7021	7461	3287.54	5064	0	0
CEBPB	NR3C1	15934	7021	4372	1926.43	3170	0	0
CEBPB	NR5A1	15934	7021	4323	1904.84	3070	0	0
CEBPB	NR6A1	15934	7021	4089	1801.74	3040	0	0
CEBPB	OSR1	15934	7021	3640	1603.89	2822	0	0
CEBPB	OSR2	15934	7021	6057	2668.9	4488	0	0
CEBPB	PARP1	15934	7021	4491	1978.87	3098	0	0
CEBPB	PAX8	15934	7021	1388	611.59	1351	0	0
CEBPB	POU4F3	15934	7021	1853	816.49	1603	0	0
CEBPB	PRRX2	15934	7021	6687	2946.49	4819	0	0
CEBPB	RELA	15934	7021	4982	2195.22	3674	0	0
CEBPB	RFX3	15934	7021	6203	2733.23	4075	0	0
CEBPB	RFX5	15934	7021	6898	3039.47	4381	0	0
CEBPB	RFX7	15934	7021	5655	2491.76	4422	0	0
CEBPB	SATB1	15934	7021	6040	2661.41	4014	0	0
CEBPB	SMAD4	15934	7021	4951	2181.56	4029	0	0
CEBPB	SMAD5	15934	7021	5433	2393.94	3713	0	0
CEBPB	SMAD9	15934	7021	5740	2529.22	4184	0	0
CEBPB	SOX17	15934	7021	5108	2250.74	3581	0	0
CEBPB	SOX18	15934	7021	6199	2731.47	4190	0	0
CEBPB	SOX5	15934	7021	4678	2061.27	3198	0	0
CEBPB	SP3	15934	7021	6974	3072.95	5024	0	0
CEBPB	SP4	15934	7021	7577	3338.65	5254	0	0
CEBPB	SPI1	15934	7021	5223	2301.41	3889	0	0
CEBPB	TEAD1	15934	7021	6741	2970.29	5039	0	0
CEBPB	TFAP2B	15934	7021	5484	2416.42	4002	0	0
CEBPB	TFCP2	15934	7021	5711	2516.44	3826	0	0
CEBPB	TGIF1	15934	7021	6781	2987.91	5002	0	0
CEBPB	TGIF2	15934	7021	7192	3169.01	4493	0	0
CEBPB	USF1	15934	7021	5916	2606.77	3889	0	0
CEBPB	ZBTB33	15934	7021	5625	2478.54	3921	0	0
CEBPB	ZBTB6	15934	7021	6193	2728.82	5134	0	0
CEBPB	ZBTB7A	15934	7021	5551	2445.94	4797	0	0
CEBPB	ZEB1	15934	7021	6373	2808.14	4856	0	0
CEBPB	ZNF354C	15934	7021	5957	2624.83	3810	0	0
CEBPB	ZNF8	15934	7021	4508	1986.36	3748	0	0
CEBPD	CEBPE	15934	7119	2691	1202.29	2330	0	0
CEBPD	CREB1	15934	7119	6109	2729.38	4030	0	0
CEBPD	CREM	15934	7119	4692	2096.29	3766	0	0
CEBPD	CTCF	15934	7119	5700	2546.65	4171	0	0
CEBPD	DLX3	15934	7119	4801	2144.99	3621	0	0
CEBPD	DLX4	15934	7119	4239	1893.9	3425	0	0
CEBPD	ESR1	15934	7119	5003	2235.24	3844	0	0
CEBPD	ETV6	15934	7119	5446	2433.17	4599	0	0
CEBPD	EWSR1	15934	7119	4241	1894.8	3166	0	0
CEBPD	FOSL1	15934	7119	5442	2431.38	4820	0	0
CEBPD	FOXC1	15934	7119	6064	2709.28	5027	0	0
CEBPD	FOXD1	15934	7119	5932	2650.3	4351	0	0
CEBPD	FOXO1	15934	7119	5880	2627.07	3815	0	0
CEBPD	GATA2	15934	7119	4630	2068.59	3181	0	0
CEBPD	GATA4	15934	7119	3245	1449.8	2783	0	0
CEBPD	GATA6	15934	7119	5780	2582.39	4461	0	0
CEBPD	GFI1B	15934	7119	1639	732.27	1451	0	0
CEBPD	HDX	15934	7119	6872	3070.28	4296	0	0
CEBPD	HES1	15934	7119	5367	2397.87	4650	0	0
CEBPD	HIC1	15934	7119	5409	2416.64	4595	0	0
CEBPD	HLX	15934	7119	6419	2867.88	4731	0	0
CEBPD	HOXB9	15934	7119	2524	1127.67	2158	0	0
CEBPD	IRF1	15934	7119	3168	1415.4	2644	0	0
CEBPD	IRF3	15934	7119	6529	2917.03	4099	0	0
CEBPD	IRF6	15934	7119	3660	1635.22	2745	0	0
CEBPD	IRX3	15934	7119	3389	1514.14	2941	0	0
CEBPD	JDP2	15934	7119	3355	1498.95	2656	0	0
CEBPD	KLF12	15934	7119	4247	1897.48	3152	0	0
CEBPD	KLF4	15934	7119	4672	2087.36	3283	0	0
CEBPD	LEF1	15934	7119	6205	2772.27	4656	0	0
CEBPD	LMO2	15934	7119	4917	2196.82	3815	0	0
CEBPD	MAF	15934	7119	5117	2286.18	3802	0	0
CEBPD	MAFF	15934	7119	4785	2137.84	3816	0	0
CEBPD	MAFK	15934	7119	6621	2958.13	5191	0	0
CEBPD	MECP2	15934	7119	7165	3201.18	5371	0	0
CEBPD	MEF2C	15934	7119	5675	2535.48	4096	0	0
CEBPD	MSX2	15934	7119	5128	2291.09	4303	0	0
CEBPD	MYBL1	15934	7119	5204	2325.05	3671	0	0
CEBPD	MYC	15934	7119	5658	2527.88	3719	0	0
CEBPD	NFATC1	15934	7119	6432	2873.69	4598	0	0
CEBPD	NFATC4	15934	7119	4877	2178.95	4275	0	0
CEBPD	NFE2	15934	7119	2137	954.77	1846	0	0
CEBPD	NFE2L1	15934	7119	4134	1846.99	3004	0	0
CEBPD	NFIA	15934	7119	6056	2705.7	4738	0	0
CEBPD	NFIB	15934	7119	6764	3022.02	4957	0	0
CEBPD	NFIL3	15934	7119	5966	2665.49	4349	0	0
CEBPD	NFKB2	15934	7119	7096	3170.35	5791	0	0
CEBPD	NR1H2	15934	7119	6180	2761.1	4167	0	0
CEBPD	NR1H3	15934	7119	6228	2782.55	4898	0	0
CEBPD	NR2C2	15934	7119	7461	3333.43	4908	0	0
CEBPD	NR2F2	15934	7119	4641	2073.51	3240	0	0
CEBPD	NR6A1	15934	7119	4089	1826.89	2954	0	0
CEBPD	OSR1	15934	7119	3640	1626.28	2996	0	0
CEBPD	OSR2	15934	7119	6057	2706.15	4801	0	0
CEBPD	PAX8	15934	7119	1388	620.13	1311	0	0
CEBPD	PPARG	15934	7119	4861	2171.8	3773	0	0
CEBPD	PRRX1	15934	7119	5303	2369.28	3738	0	0
CEBPD	PRRX2	15934	7119	6687	2987.62	4993	0	0
CEBPD	RELA	15934	7119	4982	2225.86	3809	0	0
CEBPD	RFX5	15934	7119	6898	3081.89	4412	0	0
CEBPD	RFX7	15934	7119	5655	2526.54	4389	0	0
CEBPD	RUNX3	15934	7119	3776	1687.04	3092	0	0
CEBPD	SATB1	15934	7119	6040	2698.55	3898	0	0
CEBPD	SMAD4	15934	7119	4951	2212.01	4031	0	0
CEBPD	SMAD5	15934	7119	5433	2427.36	3658	0	0
CEBPD	SMAD9	15934	7119	5740	2564.52	3906	0	0
CEBPD	SOX17	15934	7119	5108	2282.15	4151	0	0
CEBPD	SOX18	15934	7119	6199	2769.59	4517	0	0
CEBPD	SP3	15934	7119	6974	3115.85	4781	0	0
CEBPD	SP4	15934	7119	7577	3385.26	5319	0	0
CEBPD	SPI1	15934	7119	5223	2333.53	4395	0	0
CEBPD	TAL1	15934	7119	5037	2250.43	3758	0	0
CEBPD	TBX18	15934	7119	4713	2105.68	3212	0	0
CEBPD	TEAD1	15934	7119	6741	3011.75	4809	0	0
CEBPD	TFAP2B	15934	7119	5484	2450.14	3899	0	0
CEBPD	TGIF1	15934	7119	6781	3029.62	5574	0	0
CEBPD	TGIF2	15934	7119	7192	3213.25	4944	0	0
CEBPD	ZBTB6	15934	7119	6193	2766.91	5185	0	0
CEBPD	ZBTB7A	15934	7119	5551	2480.08	4740	0	0
CEBPD	ZEB1	15934	7119	6373	2847.33	4353	0	0
CEBPD	ZNF8	15934	7119	4508	2014.09	3625	0	0
CEBPE	DLX4	15934	2691	4239	715.9	1585	0	0
CEBPE	EN1	15934	2691	2200	371.55	1091	0	0
CEBPE	ESR1	15934	2691	5003	844.93	1869	0	0
CEBPE	ETV6	15934	2691	5446	919.74	2156	0	0
CEBPE	FLI1	15934	2691	5096	860.63	1756	0	0
CEBPE	FOSL1	15934	2691	5442	919.07	2021	0	0
CEBPE	FOXC1	15934	2691	6064	1024.11	2244	0	0
CEBPE	GATA1	15934	2691	1505	254.17	919	0	0
CEBPE	GATA6	15934	2691	5780	976.15	1880	0	0
CEBPE	GFI1B	15934	2691	1639	276.8	1121	0	0
CEBPE	HES1	15934	2691	5367	906.4	2050	0	0
CEBPE	HIC1	15934	2691	5409	913.49	1992	0	0
CEBPE	HLX	15934	2691	6419	1084.07	2117	0	0
CEBPE	HOXB9	15934	2691	2524	426.26	1259	0	0
CEBPE	IRF1	15934	2691	3168	535.02	1768	0	0
CEBPE	IRF4	15934	2691	3034	512.39	1565	0	0
CEBPE	IRF8	15934	2691	3317	560.19	1675	0	0
CEBPE	JDP2	15934	2691	3355	566.61	1641	0	0
CEBPE	LEF1	15934	2691	6205	1047.93	1968	0	0
CEBPE	LMO2	15934	2691	4917	830.4	1747	0	0
CEBPE	MAF	15934	2691	5117	864.18	2152	0	0
CEBPE	MAFB	15934	2691	3852	650.54	1602	0	0
CEBPE	MAFF	15934	2691	4785	808.11	1722	0	0
CEBPE	MAFK	15934	2691	6621	1118.18	2102	0	0
CEBPE	MEF2C	15934	2691	5675	958.42	1945	0	0
CEBPE	NFATC1	15934	2691	6432	1086.26	2086	0	0
CEBPE	NFATC4	15934	2691	4877	823.65	1831	0	0
CEBPE	NFE2	15934	2691	2137	360.91	1378	0	0
CEBPE	NFIB	15934	2691	6764	1142.33	2062	0	0
CEBPE	NFIL3	15934	2691	5966	1007.56	1940	0	0
CEBPE	NFKB2	15934	2691	7096	1198.4	2205	0	0
CEBPE	NR1H3	15934	2691	6228	1051.81	2329	0	0
CEBPE	NR2F2	15934	2691	4641	783.79	1695	0	0
CEBPE	OSR1	15934	2691	3640	614.74	1499	0	0
CEBPE	OSR2	15934	2691	6057	1022.93	1976	0	0
CEBPE	POU2AF1	15934	2691	2412	407.35	1508	0	0
CEBPE	PPARG	15934	2691	4861	820.95	1691	0	0
CEBPE	PRRX1	15934	2691	5303	895.59	1949	0	0
CEBPE	RUNX3	15934	2691	3776	637.71	2026	0	0
CEBPE	SOX17	15934	2691	5108	862.66	2074	0	0
CEBPE	SPI1	15934	2691	5223	882.08	2501	0	0
CEBPE	SPIB	15934	2691	2011	339.63	1324	0	0
CEBPE	TGIF1	15934	2691	6781	1145.2	2247	0	0
CEBPE	TGIF2	15934	2691	7192	1214.61	2259	0	0
CEBPE	ZBTB6	15934	2691	6193	1045.9	1952	0	0
CEBPG	EHF	15934	2576	3464	560.01	1495	0	0
CEBPG	ESR2	15934	2576	3157	510.38	1429	0	0
CEBPG	EVX1	15934	2576	3460	559.37	1405	0	0
CEBPG	GATA5	15934	2576	3833	619.67	1534	0	0
CEBPG	HAND2	15934	2576	4472	722.97	1735	0	0
CEBPG	INSM1	15934	2576	4477	723.78	1708	0	0
CEBPG	NR1H4	15934	2576	4206	679.97	1740	0	0
CEBPG	NR5A1	15934	2576	4323	698.89	1550	0	0
CEBPG	PHOX2B	15934	2576	4176	675.12	1567	0	0
CLOCK	CREB1	15934	7033	6109	2696.41	4642	0	0
CLOCK	CTCF	15934	7033	5700	2515.88	4538	0	0
CLOCK	E4F1	15934	7033	5872	2591.8	4794	0	0
CLOCK	ELF1	15934	7033	5875	2593.13	3908	0	0
CLOCK	ELK3	15934	7033	6393	2821.76	4494	0	0
CLOCK	ELK4	15934	7033	5091	2247.08	4424	0	0
CLOCK	EP300	15934	7033	5392	2379.94	4638	0	0
CLOCK	ETV3	15934	7033	6650	2935.2	5979	0	0
CLOCK	EWSR1	15934	7033	4241	1871.91	3153	0	0
CLOCK	FOXK1	15934	7033	3826	1688.73	3374	0	0
CLOCK	FOXP1	15934	7033	3281	1448.18	2673	0	0
CLOCK	GABPA	15934	7033	3781	1668.87	2974	0	0
CLOCK	GMEB1	15934	7033	5321	2348.6	3580	0	0
CLOCK	GTF2A2	15934	7033	3950	1743.46	3010	0	0
[truncated: 62,704 more rows]
